# Supplementary material for: Responder and nonresponder patients exhibit different peripheral transcriptional signatures during major depressive episode
Source: PubMed Central journal article supplement — Transl Psychiatry. 2012 Nov 13;2(11):e185–. doi: 10.1038/tp.2012.112 (PMC3565773; doi:10.1038/tp.2012.112), 2012-11-13
Supplement: tp2012112x1.pdf [file tp2012112x1.pdf]

-- SUPPLEMENTARY INFORMATION--

**Responder and nonresponder patients exhibit different peripheral transcriptional signatures during Major Depressive Episode**

Raoul Belzeaux<sup>1,2,3</sup>; Aurélie Bergon<sup>2,4,5</sup>; Valérie Jeanjean<sup>1,2</sup>; Béatrice Lloriod<sup>4,5</sup>; Christine Formisano-Tréziny<sup>6,7</sup>; Lore Verrier<sup>2</sup>; Anderson Loundou<sup>8,9</sup>; Karine Baumstarck-Barrau<sup>8,9</sup>; Laurent Boyer<sup>9,10</sup>; Valérie Gall<sup>4,5</sup>; Jean Gabert<sup>6,7,11</sup>; Catherine Nguyen<sup>4,5</sup>; Jean-Michel Azorin<sup>2,3</sup>; Jean Naudin<sup>2</sup>; El Chérif Ibrahim<sup>1,\*</sup>.

<sup>1</sup>Aix-Marseille Université, CNRS, CRN2M UMR 7286, <sup>2</sup>Pôle de Psychiatrie Universitaire Solaris, Hôpital Sainte Marguerite, Assistance Publique–Hôpitaux de Marseille, Marseille, France, <sup>3</sup>FondaMental, Fondation de Recherche et de Soins en Santé Mentale, Paris, France, <sup>4</sup>INSERM, TAGC-UMR 1090, <sup>5</sup>Aix-Marseille Université, TAGC-UMR 1090, Parc scientifique de Luminy, Marseille, France, <sup>6</sup>INSERM, UNIS, U-1072, <sup>7</sup>Aix-Marseille Université, UNIS, U-1072, 13015, Marseille, France, <sup>8</sup>Unité d'aide méthodologique, Faculté de Médecine Timone, <sup>9</sup>Department of Public Health, Hôpital La Timone, Assistance Publique–Hôpitaux de Marseille, France, <sup>10</sup>Aix-Marseille Université, Research Unit EA 3279, <sup>11</sup>Laboratoire de Biochimie-Biologie Moléculaire, Hôpital Nord, Assistance Publique–Hôpitaux de Marseille, France

\*To whom correspondence should be addressed. E-mail: el-cherif.ibrahim@univ-amu.fr

| <b>CONTENTS</b>                                    | <b>Page</b> |
|----------------------------------------------------|-------------|
| <b>1 SUPPLEMENTARY METHODS</b>                     | <b>2</b>    |
| 1.1 DESIGN SETTING AND SUBJECTS                    | 2           |
| 1.2 BLOOD mRNA EXTRACTION                          | 3           |
| 1.3 PREPARATION OF SAMPLES AND MICORARRAY ASSAY    | 3           |
| 1.4 GENE AND CHROMOSOME BAND ENRICHMENT ANALYSES   | 4           |
| 1.5 MIRNA QUANTIFICATION                           | 5           |
| 1.6 TARGET PREDICTION                              | 6           |
| 1.7 REAL-TIME RT-PCR FOR CANDIDATE GENE VALIDATION | 6           |
| 1.8 STATISTICAL ANALYSIS                           | 7           |
| 1.8.1 DEMOGRAPHIC AND CLINICAL DATA                | 7           |
| 1.8.2 MICROARRAY DATA                              | 7           |
| 1.8.3 MIRNA STUDY                                  | 8           |
| 1.8.4 CANDIDATE GENE VALIDATION                    | 9           |
| <b>2 SUPPLEMENTARY TABLES</b>                      | <b>10</b>   |
| <b>3 SUPPLEMENTARY FIGURES</b>                     | <b>44</b>   |
| <b>4 REFERENCES</b>                                | <b>47</b>   |

# 1 SUPPLEMENTARY METHODS

## 1.1 *Design setting and subjects*

The study design was a naturalistic, prospective, longitudinal and comparative study with assessments of major depressive episode (MDE) patients and healthy controls at baseline (week 0), 2 and 8 weeks after inclusion. Sixteen patients who met the Diagnostic and Statistical Manual of Mental Disorders, fourth edition, text revision (DSM-IV-TR) criteria for major depressive disorder (MDD) participated in the study.<sup>1</sup> Inclusion criteria were: (i) treated or untreated MDE (ii) 17-item Hamilton Rating Scale for Depression (HDRS) score  $\geq 20$  corresponding to severe or very severe MDE.<sup>2</sup> Patients with bipolar disorder, schizophrenia, personality disorder, substance use disorder, medical problems, abnormal body temperature or laboratory tests (especially blood cell count), and neurological exploration were excluded. Patients were clinically evaluated using an adapted standardized procedure (SCID-I/P)<sup>3</sup>. Socio-demographic information including age, gender, marital status and educational level was collected. The severity of MDE was evaluated with a French version of 17-item HDRS at each evaluation.<sup>4</sup> Presence of recurrent MDD, episode duration, familial history of MDE and other severe psychiatric disorders, suicide attempts history, and tobacco smoking were evaluated.

At the end of the 8-week clinical follow-up, patients were classified as responders and nonresponders based on the consensual definition of clinical response corresponding to a minimal reduction of 50 % of the HDRS score from the initial evaluation.<sup>5</sup> The first nine patients, classified as responders, and their matched controls were organized by pairs within cohort A. The other patient/control pairs formed cohort B.

For the control group, age- and sex-matched subjects were evaluated to exclude any patients with a history of psychiatric disorder using the French version of standardized interview validated for health control subjects (SCID-NP). Moreover, all participants were

carefully interviewed and had clinical examinations to eliminate any psychiatric or medical conditions. Tobacco smoking was also evaluated.

All experiments on human subjects were conducted in accordance with the latest version of the Declaration of Helsinki. The project was approved by the local ethics committee (Comité de Protection des Personnes, CPP Sud Méditerranée II, Marseille, France, study registered under number 09.025) and written informed consent was obtained after a complete description of the study to the subjects.

## **1.2 Blood mRNA extraction**

At each evaluation, 8-10 ml venous blood was collected from fasting patients and matched-controls in EDTA tubes between 7:00 a.m. and 9:00 a.m. and processed within two hours. Peripheral blood mononuclear cells (PBMCs) were isolated from the blood by Ficoll density centrifugation. Total RNAs were extracted from the PBMCs with the mirVana miRNA isolation kit (Ambion, Austin, TX) according to the manufacturer's protocol. RNA concentration was determined using a nanodrop ND-1000 spectrophotometer (NanoDrop Technologies, Wilmington, DE). RNA integrity was assessed on an Agilent 2100 Bioanalyzer (Agilent Technologies, Santa Clara, CA). To ensure a robust analysis for the following procedures, samples with an RNA integrity number (RIN) inferior to 8 were excluded.

## **1.3 Preparation of samples and micorarray assay**

Sample amplification, labeling, and hybridization essentially followed the one-color microarray-based gene expression analysis (low RNA input linear amplification PLUS kit) recommended by Agilent Technologies. In brief, 200 ng of each total RNA sample was reverse transcribed into cDNA using oligo dT-T7 promoter primer. Labeled cRNA was prepared from the cDNA. The reaction was performed in a solution containing dNTP mix, cyanine 3-dCTP, and T7 RNA polymerase, and incubated at 40°C for 2h. It was followed by

RNeasy column purification (QIAGEN, Valencia, CA). Dye incorporation and cRNA yield were checked with the NanoDrop ND-1000 Spectrophotometer. 600 ng of cyanine 3-labeled cRNA (specific activity > 6 pmol Cy3/ug cRNA) was fragmented at 60°C for 30 minutes before hybridization, for 17 hours at 65°C in a rotating Agilent hybridization oven, onto Agilent whole human genome oligo microarrays containing 50 599 different oligonucleotide probes (SurePrint G3 Human GE 8x60K, Agilent Technologies, Santa Clara, CA) and covering 27 958 Entrez Gene RNAs and 7 419 lincRNAs. Microarrays were then washed according to manufacturer's instructions. Slides were scanned immediately after washing on the Agilent DNA microarray scanner (G2505C) using one color scan setting for 8x60K array slides. The scanned images were analyzed with Agilent feature extraction software 10.5.1.1 using default parameters (protocol GE1\_107\_Sep09 and Grid 028004\_D\_F\_20110325) to obtain background subtracted and spatially detrended processed signal intensities. All data were normalized by quantile normalization using limma R/bioconductor package (v.2.16.4). Only 39 784 oligonucleotide probes with signal intensities detectable (i.e. above background according to the "gIsWellAboveBg" Agilent feature extraction value) in  $\geq 70\%$  of samples (from either MDE patients or controls and at either baseline or 8 weeks later) were subsequently analyzed. This filtering step was obtained using the AgiND R package (<http://tagc.univ-mrs.fr/tagc/index.php/software/agind>, v1.0.5). The microarray data are available from the gene expression omnibus (GEO, <http://www.ncbi.nlm.nih.gov/geo/>) under the series accession number GSE38206.

#### **1.4 Gene and chromosome band enrichment analyses**

Lists of genes with significant changes were uploaded on DAVID (database for annotation, visualization and integrated discovery) for identifying statistically relevant signaling pathways<sup>6</sup> using high classification stringency, P-value (p) < 0.05 and false discovery rate (FDR)  $\leq 5\%$ . The sequences for the boundaries of the chromosomal regions where the probes

to detect differential expression are located were obtained from the Ensembl database (Human reference assembly GRCh37, WTSI/EBI). To determine the chromosomal cytoband enrichment in our lists of genes, we used the ToppFun algorithm and restricted the search to  $p < 0.05$ .<sup>7</sup> To take into account multiple testings, the FDR was calculated with the PROC MULTTEST statement as previously described.

### **1.5 MiRNA quantification**

400 ng of total RNA were reverse transcribed using the TaqMan MicroRNA RT kit (Applied Biosystems, Foster City, CA) in combination with the stem-loop Megaplex<sup>TM</sup> primer pools (A and B v3.0, Applied Biosystems) without preamplification and according to manufacturer's recommendation. For each RT pool, the equivalent of 320 ng of total RNA converted into cDNA was mixed with TaqMan Universal PCR Master Mix II No AmpErase UNG (Applied Biosystems, Foster City, CA). 100  $\mu$ l of mix (A or B) was loaded into each port of the corresponding 384 wells Human miRNA TaqMan low density array (i.e. A or B) and run for 40 cycles on a ABI PRISM 7900 HT according to manufacturer's protocol with SDS v2.4 software. Raw Ct values were calculated using the RQ Manager software v1.2.1 with manual baseline settings for each miRNA. Only those miRNAs detectable ( $Ct < 33$ ) in PBMCs of  $\geq 60\%$  the samples (MDE patients or controls) were subsequently analyzed. The raw Ct values were then normalized based on the expression level of a combination of 2 to 5 reference miRNAs, exhibiting a stable level of expression among all samples, and selected with both the genorm<sup>PLUS</sup> (Biogazelle, Zulte, Belgium)<sup>8</sup> and DataAssist softwares. In order to normalize the target miRNA with reference miRNAs exhibiting a proximal expression level (i.e. difference between the target and the reference miRNAs  $< 3$  Ct), 5 windows of expression levels ( $Ct < 21$ ;  $21 < Ct < 24$ ;  $24 < Ct < 27$ ;  $27 < Ct < 30$ ;  $Ct > 30$ ) were defined in which a specific set of reference miRNAs were selected. Normalized expression levels of each miRNA are also quantified as  $2^{-\Delta\Delta Ct}$ ,<sup>9</sup> with the DataAssist software (Applied Biosystems,

v3.0), relative to the normalized expression level of the same miRNA in a calibrator sample (either the mean of 9 samples from the 9 control subjects when comparing patients to controls, or the week 0 sample of the MDE patient when comparing patient at week 0 to the same patient 8 weeks later).

## **1.6 Target prediction**

For each list of differentially expressed miRNAs, the Ingenuity pathway analysis (IPA) software (Ingenuity systems), which relies on 3 popular algorithms (TargetSan, TarBase and miRecords), was queried to identify targets within lists of differentially expressed genes in our microarray analysis. Only highly predicted and experimentally validated targets were considered for further analysis.

## **1.7 Real-time RT-PCR for candidate gene validation**

1.6 µg of RNA was reverse transcribed with the High Capacity cDNA archive kit (Applied Biosystems, Foster City, CA, USA). 200 ng of the resulting cDNA was combined with a TaqMan® universal PCR Master Mix (Applied Biosystems) and 48 PCR reactions were simultaneously performed on an ABI PRISM 7900HT thermocycler using tLDA technology according to manufacturer recommendations (Applied Biosystems). All PCR reactions were performed in triplicate. For each tested candidate gene, primer sets and probes were selected using the web portal of the manufacturer (Applied Biosystems) to amplify sequences matching as close as possible the transcripts detected by the Agilent probe in our initial microarray screen. In addition, after a search within our microarray data for probes showing minimal variation of signal intensity among the 36 samples tested from both MDE patients and controls, we selected 3 genes, in addition to very highly expressed gene *GAPDH*

(imposed by the manufacturer), to be used as highly (*PAFAH1B1*), moderately (*ALDOC*) and weakly (*SV2A*) expressed reference genes. After verifying with DataAssist that our 4 selected reference genes were stably expressed among all the samples from MDE patients and controls tested by RT-qPCR, we set-up 4 windows of expression intensities to normalize target gene expression ( $21 < Ct < 24$ ;  $24 < Ct < 27$ ;  $27 < Ct < 30$ ;  $Ct > 30$ ) using adequate reference genes alone or in combination (Supplementary Table 17). The expression level of each candidate gene was calculated as  $2^{-\Delta\Delta C_t}$  with the DataAssist software (Applied Biosystems, v3.0), in which each candidate gene is quantified relative to the expression of a single, or a combination of two reference genes, to calculate a proximal level (i.e. difference between the target and the reference miRNA  $< 3$  Ct) of expression compared to the target gene, and compared to a calibrator sample (the mean of the samples from the control subjects at week 0 when comparing patients to controls).

## **1.8 Statistical Analysis**

### **1.8.1 Demographic and clinical data**

Demographic and clinical variables were compared between patients and matched-controls for cohort A and between responder and nonresponder patients with a Fisher exact test for qualitative variables and a t-test for quantitative variables. All statistical tests were made using the IBM SPSS Statistics v20 software.

### **1.8.2 Microarray data**

To calculate the number of samples required to draw conclusions with enough statistical power for our microarray screen, we determined a minimum sample size ( $n=9$ ) by using sizepower tool within the R/bioconductor package<sup>10</sup> with the following parameters: FDR = 5 %, number of significant genes ( $\pi_0$ )  $\geq 0.5\%$ , power of the study = 90%, expected difference

between groups = 1.5, and standard deviation = 0.5 (Supplementary Figure 1). Accordingly, samples of the first 9 responder MDE patients and matched controls at the inclusion visit and eight weeks later were assessed in the microarray analysis and constituted 4 different groups: "MDE<sub>0w</sub>" for responder patients at the inclusion, "MDE<sub>8w</sub>" for responders patients eight weeks later, "C<sub>0w</sub>" for matched control subjects at the inclusion and "C<sub>8w</sub>" for matched control subjects eight weeks later.

For each comparison ("MDE<sub>0w</sub>" versus "C<sub>0w</sub>", "MDE<sub>0w</sub>" versus "C<sub>8w</sub>", "MDE<sub>8w</sub>" versus "C<sub>0w</sub>", "MDE<sub>8w</sub>" versus "C<sub>8w</sub>", "MDE<sub>0w</sub>" versus "MDE<sub>8w</sub>", and "C<sub>0w</sub>" versus "C<sub>8w</sub>"), measurements of differential gene expression were obtained using the MultiExperiment Viewer 4 (MeV4, TM4 software suite), and the significant analysis for microarrays program (SAM) was set at FDR threshold of 5%.<sup>11,12</sup> Student's t-tests were also applied to determine P-values. The data were analyzed using either a two-class unpaired (for patients versus controls comparison) or paired (for internal comparisons within patients or within controls) response types.

The gene list that distinguishes "MDE<sub>0w</sub>" and "C<sub>0w,8w</sub>" was obtained by crossing the lists "MDE<sub>0w</sub>" versus "C<sub>0w</sub>" and "MDE<sub>0w</sub>" versus "C<sub>8w</sub>". Similarly, the gene list that distinguishes "MDE<sub>8w</sub>" and "C<sub>0w,8w</sub>" was obtained by crossing the lists "MDE<sub>8w</sub>" versus "C<sub>0w</sub>" and "MDE<sub>8w</sub>" versus "C<sub>8w</sub>".

### 1.8.3 MiRNA study

To select differentially expressed miRNAs (at 0 and 8-week visits), non-parametric unpaired Mann-Whitney tests were used to compare the fold change (FC) between patients and matched-controls with a threshold P-value of 0.05. Non-parametric paired Wilcoxon tests were used to compare the FC between the two evaluations within the MDE group with a threshold P-value of 0.05.



#### 1.8.4 Candidate gene validation

For exploratory purposes and to compare microarray data with RT-qPCR data, parametric unpaired t-tests were used to compare the FC between patients and matched-controls at the first evaluation, and 8 weeks later, within either the whole cohort ( $FC_{all}$ ), the initial sub-cohort A ( $FC_A$ ), or the subsequent sub-cohort B ( $FC_B$ ).

Since we conducted a prospective study with three visits and have repeated measures for each subject, a mixed linear model method was used for each candidate mRNA to test the differences between responders and nonresponders patients. As potential confounding factors could introduce bias in the observed results, additional characteristics were taken into account and tested as co-variables in the mixed linear model such as sex, age, and treatments received. To explore differences between responders and nonresponders, we calculated and compared marginal estimated mean of each group.

Finally, to quantitatively explore the predictive value of the best mRNA candidates in the previous analysis, we calculated Spearman's correlations between HDRS evolution (0 to 8- and 2 to 8-week intervals) and FC at inclusion or at 2 weeks, respectively. Moreover, a discriminant function analysis was used with the goal of establishing a predictive score to classify patients in the responder versus nonresponder groups. Sensitivity, specificity, positive/negative predictive value, and the confidence intervals of each selected mRNA candidates, or a combination of the best classifiers, were computed for the combination of selected variables. Receiver-operating characteristic (ROC) curves analysis was used to determine the area under the curve (AUC).

## 2 SUPPLEMENTARY TABLES

**Supplementary Table ST1: Baseline characteristics of the major depression cohort**

| Pairs | Age of onset | Familial history of MDE | Familial history of other severe psychiatric disorders | Episode duration at the inclusion (month) | Suicide attempts | Smoking | Educational level | Marital status |
|-------|--------------|-------------------------|--------------------------------------------------------|-------------------------------------------|------------------|---------|-------------------|----------------|
| 1     | 60           | Y                       | Y                                                      | 12                                        | N                | N       | Grad.             | Married        |
| 2     | 20           | Y                       | Y                                                      | 16                                        | N                | N       | Grad.             | Married        |
| 3     | 45           | Y                       | N                                                      | 2                                         | N                | N       | Undergrad.        | Married        |
| 4     | 33           | N                       | Y                                                      | 4                                         | Y                | N       | Undergrad.        | Divorced       |
| 5     | 37           | Y                       | N                                                      | 3                                         | N                | Y       | High School       | Divorced       |
| 6     | 57           | Y                       | N                                                      | 12                                        | Y                | N       | Undergrad.        | Married        |
| 7     | 43           | N                       | Y                                                      | 4                                         | Y                | N       | Undergrad.        | Married        |
| 8     | 46           | Y                       | N                                                      | 6                                         | N                | N       | Grad.             | Married        |
| 9     | 18           | N                       | Y                                                      | 2                                         | N                | N       | Grad.             | Married        |
| 10    | 55           | Y                       | N                                                      | 11                                        | Y                | N       | Grad.             | Divorced       |
| 11    | 70           | Y                       | N                                                      | 6                                         | Y                | N       | Undergrad.        | Married        |
| 12    | 37           | Y                       | N                                                      | 3                                         | N                | N       | Grad.             | Married        |
| 13    | 51           | Y                       | N                                                      | 3                                         | Y                | N       | High School       | Divorced       |
| 14    | 32           | N                       | Y                                                      | 1                                         | N                | N       | Grad.             | Married        |
| 15    | 39           | Y                       | N                                                      | 1                                         | N                | N       | Undergrad.        | Single         |
| 16    | 29           | Y                       | Y                                                      | 16                                        | Y                | Y       | Undergrad.        | Married        |

Abbreviations: Grad., graduate studies; N, no; Undergrad., incompleting undergraduate degree; Y, yes.

**Supplementary Table ST2: Baseline characteristics of the healthy control cohort**

| Pairs | Familial history of MDE | Familial history of other severe psychiatric disorders | Smoking | Educational level | Marital status |
|-------|-------------------------|--------------------------------------------------------|---------|-------------------|----------------|
| 1     | N                       | N                                                      | Y       | Grad.             | Married        |
| 2     | N                       | N                                                      | Y       | High School       | Divorced       |
| 3     | N                       | Y                                                      | N       | Undergrad.        | Divorced       |
| 4     | Y                       | N                                                      | N       | Grad.             | Married        |
| 5     | N                       | N                                                      | N       | Grad.             | Married        |
| 6     | N                       | N                                                      | N       | Grad.             | Married        |
| 7     | N                       | N                                                      | N       | Grad.             | Married        |
| 8     | N                       | N                                                      | N       | Grad.             | Married        |
| 9     | N                       | N                                                      | Y       | Grad.             | Married        |
| 10    | N                       | N                                                      | N       | Undergrad.        | Married        |
| 11    | N                       | Y                                                      | N       | Grad.             | Married        |
| 12    | N                       | N                                                      | N       | Grad.             | Married        |
| 13    | N                       | N                                                      | N       | Undergrad.        | Married        |

Abbreviations: Grad., graduate studies; N, no; Undergrad., incompleting undergraduate degree; Y, yes.

### Supplementary Table ST3: Demographic and clinical characteristics of study

#### participants

| Variable                                                 | MDE patients | Control subjects | P-value <sup>1</sup> |
|----------------------------------------------------------|--------------|------------------|----------------------|
| Sex (female/male)                                        | 7/9          | 7/6              | 0.715                |
| Age (years)                                              | 55.3 ± 2.7   | 55.5 ± 2.6       | 0.940                |
| Smocking (yes/no)                                        | 2/14         | 3/10             | 0.632                |
| Educational level (graduate studies, yes/no)             | 7/9          | 9/4              | 0.264                |
| Married (yes/no)                                         | 11/5         | 11/2             | 0.410                |
| <b>Familial history of MDD (yes/no)</b>                  | <b>12/4</b>  | <b>1/12</b>      | <b>0.000498</b>      |
| Familial history of severe psychiatric disorder (yes/no) | 7/9          | 2/11             | 0.130                |

<sup>1</sup>t-test was used for quantitative variables and a Fisher's exact test for categorical variables

## Supplementary Table ST4: Comparison of demographic and clinical characteristics of

### MDE patients between responders and nonresponders

| Variable                                                 | Responder patients | Nonresponder patients | P-value <sup>1</sup> |
|----------------------------------------------------------|--------------------|-----------------------|----------------------|
| Sex (female/male)                                        | 6/4                | 1/5                   | 0.145                |
| Age (years)                                              | 56.2 ± 2.7         | 53.7 ± 5.9            | 0.666                |
| Smocking (yes/no)                                        | 1/9                | 1/5                   | 1.000                |
| Educational level (graduate studies, yes/no)             | 5/5                | 2/4                   | 0.633                |
| Married (yes/no)                                         | 8/2                | 3/3                   | 0.299                |
| HDRS at the inclusion                                    | 27.2 ± 1.6         | 27.0 ± 2.5            | 0.945                |
| Episode duration prior to inclusion (months)             | 6.4 ± 1.6          | 6.3 ± 2.5             | 0.981                |
| Recurrent MDD (yes/no)                                   | 8/2                | 4/2                   | 0.604                |
| Personal history of suicide attempts (yes/no)            | 2/8                | 3/3                   | 0.299                |
| Familial history of MDD (yes/no)                         | 7/3                | 5/1                   | 1.000                |
| Familial history of severe psychiatric disorder (yes/no) | 5/5                | 2/4                   | 0.633                |

<sup>1</sup>t-test was used for quantitative variables and a Fisher's exact test for categorical variables

**Supplementary Table ST5: Overexpressed transcripts in MDE subjects at week 0 compared to controls (weeks 0 and 8)**

| Probe                 | Accession        | Gene description                                                                | Gene symbol   | Cytoband       | Fold change | P-value        |
|-----------------------|------------------|---------------------------------------------------------------------------------|---------------|----------------|-------------|----------------|
| <b>A_23_P115885</b>   | <b>NM_004897</b> | <b>multiple inositol-polyphosphate phosphatase 1, transcript variant 1</b>      | <b>MINPP1</b> | <b>10q23.2</b> | <b>3.80</b> | <b>2.92E-8</b> |
| A_33_P3249046         | NM_001171092     | claudin 2, transcript variant 2                                                 | CLDN2         | Xq22.3         | 3.08        | 1.57E-5        |
| <b>A_19_P00809807</b> |                  | <b>lincRNA:chr10:131973130-131978637_R</b>                                      |               | <b>10q26.3</b> | <b>3.05</b> | <b>1.95E-5</b> |
| <b>A_19_P00812661</b> |                  | <b>lincRNA:chr8:129503568-129843218_R</b>                                       |               | <b>8q24.21</b> | <b>2.80</b> | <b>1.20E-7</b> |
| A_23_P59261           | NM_006670        | trophoblast glycoprotein, transcript variant 1                                  | TPBG          | 6q14.1         | 2.67        | 3.05E-4        |
| A_24_P242646          | NM_004079        | cathepsin S, transcript variant 1                                               | CTSS          | 1q21.3         | 2.64        | 8.82E-4        |
| A_33_P3232945         | NM_005242        | coagulation factor II (thrombin) receptor-like 1                                | F2RL1         | 5q13.3         | 2.53        | 2.74E-5        |
| <b>A_19_P00331948</b> |                  | <b>lincRNA:chr6:34244122-34253868_F</b>                                         |               | <b>6p21.33</b> | <b>2.51</b> | <b>7.33E-9</b> |
| A_24_P333663          | NM_002748        | mitogen-activated protein kinase 6                                              | MAPK6         | 15q21.2        | 2.44        | 2.82E-5        |
| A_33_P3358824         | NM_000302        | procollagen-lysine 1, 2-oxoglutarate 5-dioxygenase 1                            | PLOD1         | 1p36.22        | 2.35        | 6.20E-7        |
| A_24_P226108          | NM_019027        | RNA binding motif protein 47, transcript variant 2                              | RBM47         | 4p14           | 2.32        | 8.71E-5        |
| <b>A_24_P276628</b>   | <b>NM_000310</b> | <b>palmitoyl-protein thioesterase 1, transcript variant 1</b>                   | <b>PPT1</b>   | <b>1p34.2</b>  | <b>2.30</b> | <b>1.24E-6</b> |
| A_33_P3276713         | NM_001010931     | hepatocyte growth factor (hepapoietin A; scatter factor), transcript variant 2  | HGF           | 7q21.11        | 2.28        | 7.22E-6        |
| A_23_P396777          | NM_006315        | polycomb group ring finger 3                                                    | PCGF3         | 4p16.3         | 2.25        | 8.11E-5        |
| A_23_P36611           | NM_181861        | apoptotic peptidase activating factor 1, transcript variant 3                   | APAF1         | 12q23.1        | 2.24        | 1.49E-4        |
| A_33_P3403418         | NM_001903        | catenin (cadherin-associated protein), alpha 1, 102kDa                          | CTNNA1        | 5q31.2         | 2.22        | 1.82E-4        |
| <b>A_23_P171054</b>   | <b>NM_005229</b> | <b>ELK1, member of ETS oncogene family, transcript variant 2</b>                | <b>ELK1</b>   | <b>Xp11.23</b> | <b>2.09</b> | <b>2.59E-6</b> |
| A_24_P605190          | NM_005023        | protein geranylgeranyltransferase type I, beta subunit                          | PGGT1B        | 5q22.3         | 2.08        | 1.25E-4        |
| A_23_P66891           | NM_012121        | CDC42 effector protein (Rho GTPase binding) 4                                   | CDC42EP4      | 17q25.1        | 2.07        | 1.03E-4        |
| A_33_P3337981         | NM_014845        | FIG4 homolog, SAC1 lipid phosphatase domain containing ( <i>S. cerevisiae</i> ) | FIG4          | 6q21           | 2.06        | 2.84E-4        |
| <b>A_33_P3224212</b>  | <b>NM_015361</b> | <b>R3H domain containing 1</b>                                                  | <b>R3HDM1</b> | <b>2q21.3</b>  | <b>2.05</b> | <b>1.70E-4</b> |
| A_33_P3299754         | NM_021252        | RAB18, member RAS oncogene family                                               | RAB18         | 10p12.1        | 2.05        | 6.88E-5        |
| A_19_P00319055        |                  | lincRNA:chr22:31369198-31371363_R                                               |               | 22q12.1        | 2.04        | 5.99E-7        |
| A_23_P381203          | NM_015202        | KIAA0556                                                                        | KIAA0556      | 16p12.1        | 2.03        | 6.35E-5        |
| <b>A_23_P37988</b>    | <b>NM_152727</b> | <b>copine II</b>                                                                | <b>CPNE2</b>  | <b>16q13</b>   | <b>2.00</b> | <b>6.01E-6</b> |
| <b>A_23_P125082</b>   | <b>NM_002199</b> | <b>interferon regulatory factor 2</b>                                           | <b>IRF2</b>   | <b>4q35.1</b>  | <b>2.00</b> | <b>3.67E-6</b> |
| A_24_P272761          | NM_020946        | DENN/MADD domain containing 1A, transcript variant 1                            | DENND1A       | 9q33.3         | 2.00        | 2.59E-5        |
| A_23_P347048          | NM_030791        | sphingosine-1-phosphate phosphatase 1                                           | SGPP1         | 14q23.2        | 1.99        | 6.88E-5        |
| <b>A_23_P217564</b>   | <b>NM_004458</b> | <b>acyl-CoA synthetase long-chain family member 4, transcript variant 1</b>     | <b>ACSL4</b>  | <b>Xq23</b>    | <b>1.98</b> | <b>4.03E-5</b> |
| A_32_P18159           | NM_181705        | Lyrn7 homolog (mouse)                                                           | LYRM7         | 5q23.3         | 1.95        | 1.41E-4        |

|               |                 |                                                                                                        |                  |                 |             |                |
|---------------|-----------------|--------------------------------------------------------------------------------------------------------|------------------|-----------------|-------------|----------------|
| A_33_P3279545 | NM_005734       | homeodomain interacting protein kinase 3, transcript variant 1                                         | HIPK3            | 11p13           | 1.95        | 2.17E-4        |
| A_32_P155506  | NM_152653       | <b>ubiquitin-conjugating enzyme E2E 2 (UBC4/5 homolog, yeast)</b>                                      | <b>UBE2E2</b>    | <b>3p24.3</b>   | <b>1.95</b> | <b>1.74E-6</b> |
| A_24_P312692  | NM_006595       | <b>apoptosis inhibitor 5, transcript variant 2</b>                                                     | <b>API5</b>      | <b>11p12</b>    | <b>1.94</b> | <b>8.01E-9</b> |
| A_23_P330836  | ENST00000357412 | <b>chromosome X open reading frame 24 [Source:HGNC Symbol;Acc:27333]</b>                               | <b>CXORF24</b>   | <b>Xp11.23</b>  | <b>1.94</b> | <b>5.69E-7</b> |
| A_23_P122375  | NM_021943       | <b>zinc finger, AN1-type domain 3</b>                                                                  | <b>ZFAND3</b>    | <b>6p21.2</b>   | <b>1.93</b> | <b>6.61E-9</b> |
| A_24_P383901  | XR_017601       | <b>PREDICTED: similar to Actin, cytoplasmic 1</b>                                                      | <b>LOC391334</b> | <b>22q13.2</b>  | <b>1.91</b> | <b>1.13E-8</b> |
| A_23_P133438  | NM_019018       | family with sequence similarity 105, member A                                                          | FAM105A          | 5p15.2          | 1.89        | 4.71E-6        |
| A_23_P355455  | NM_014744       | <b>TBC1 domain family, member 5, transcript variant 2</b>                                              | <b>TBC1D5</b>    | <b>3p24.3</b>   | <b>1.88</b> | <b>6.20E-9</b> |
| A_33_P3238993 | NM_001135187    | ArfGAP with FG repeats 1, transcript variant 1                                                         | AGFG1            | 2q36.3          | 1.88        | 2.04E-4        |
| A_33_P3330841 | NM_004507       | HUS1 checkpoint homolog (S. pombe)                                                                     | HUS1             | 7p13-p12        | 1.87        | 6.41E-4        |
| A_23_P146379  | NM_012416       | RAN binding protein 6, transcript variant 1                                                            | RANBP6           | 9p24.1          | 1.86        | 1.24E-4        |
| A_24_P14367   | NM_002819       | polypyrimidine tract binding protein 1, transcript variant 1                                           | PTBP1            | 19p13.3         | 1.86        | 1.19E-6        |
| A_33_P3338956 | NM_018184       | ADP-ribosylation factor-like 8B                                                                        | ARL8B            | 3p26.1          | 1.84        | 4.45E-4        |
| A_24_P353794  | NM_004481       | UDP-N-acetyl-alpha-D-galactosamine:polypeptide N-acetylgalactosaminyltransferase 2 (GalNAc-T2)         | GALNT2           | 1q42.13         | 1.84        | 1.24E-6        |
| A_24_P267522  | NM_152655       | zinc finger protein 585A, transcript variant 1                                                         | ZNF585A          | 19q13.12        | 1.84        | 4.05E-7        |
| A_24_P174341  | NM_058241       | cyclin T2 (CCNT2), transcript variant b                                                                | CCNT2            | 2q21.3          | 1.83        | 2.27E-5        |
| A_24_P103060  | NM_139279       | multiple coagulation factor deficiency 2, transcript variant 1                                         | MCFD2            | 2p21            | 1.81        | 7.93E-5        |
| A_23_P105571  | NM_020244       | choline phosphotransferase 1                                                                           | CHPT1            | 12q23.2         | 1.80        | 3.84E-6        |
| A_33_P3398533 | NM_025138       | proline and serine rich 1                                                                              | PROSER1          | 13q13.3         | 1.80        | 7.55E-6        |
| A_23_P145584  | NM_003344       | ubiquitin-conjugating enzyme E2H (UBC8 homolog, yeast), transcript variant 1                           | UBE2H            | 7q32.2          | 1.76        | 1.23E-4        |
| A_33_P3254191 | NM_020841       | oxysterol binding protein-like 8, transcript variant 1                                                 | OSBPL8           | 12q21.2         | 1.76        | 1.51E-5        |
| A_23_P37598   | NM_012428       | neuroplastin, transcript variant b                                                                     | NPTN             | 15q24.1         | 1.76        | 1.81E-6        |
| A_24_P374319  | NM_021183       | RAP2C, member of RAS oncogene family                                                                   | RAP2C            | Xq26.2          | 1.76        | 2.25E-4        |
| A_23_P210538  | NM_182764       | engulfment and cell motility 2, transcript variant 2                                                   | ELMO2            | 20q13.12        | 1.73        | 8.49E-7        |
| A_23_P338325  | NM_005230       | ELK3, ETS-domain protein (SRF accessory protein 2)                                                     | ELK3             | 12q23.1         | 1.72        | 3.19E-5        |
| A_24_P141786  | NM_001681       | <b>ATPase, Ca<sup>++</sup> transporting, cardiac muscle, slow twitch 2, transcript variant 2</b>       | <b>ATP2A2</b>    | <b>12q24.11</b> | <b>1.72</b> | <b>4.87E-5</b> |
| A_23_P121527  | NM_015990       | kelch-like 5 (Drosophila), transcript variant 1                                                        | KLHL5            | 4p14            | 1.71        | 8.19E-7        |
| A_23_P130352  | NM_198991       | potassium channel tetramerisation domain containing 1, transcript variant 2                            | KCTD1            | 18q11.2         | 1.71        | 3.19E-4        |
| A_24_P116805  | NM_213662       | signal transducer and activator of transcription 3 (acute-phase response factor), transcript variant 3 | STAT3            | 17q21.2         | 1.70        | 1.80E-4        |
| A_24_P238744  | NM_001145442    | <b>POTE ankyrin domain family, member M</b>                                                            | <b>POTEM</b>     | <b>14q11.2</b>  | <b>1.70</b> | <b>2.21E-6</b> |
| A_24_P6903    | NM_001017992    | <b>actin, beta-like 2</b>                                                                              | <b>ACTBL2</b>    | <b>5q11.2</b>   | <b>1.69</b> | <b>2.54E-8</b> |
| A_33_P3305974 | NM_003825       | synaptosomal-associated protein, 23kDa, transcript variant 1                                           | SNAP23           | 15q15.1         | 1.69        | 2.93E-4        |

|                      |                     |                                                                                                                                              |                |               |             |                 |
|----------------------|---------------------|----------------------------------------------------------------------------------------------------------------------------------------------|----------------|---------------|-------------|-----------------|
| A_33_P3376636        | NM_001017989        | optic atrophy 3 (autosomal recessive, with chorea and spastic paraplegia), nuclear gene encoding mitochondrial protein, transcript variant 1 | OPA3           | 19q13.32      | 1.69        | 7.54E-8         |
| A_24_P156049         | NM_012319           | solute carrier family 39 (zinc transporter), member 6, transcript variant 1                                                                  | SLC39A6        | 18q12.2       | 1.69        | 1.84E-5         |
| A_23_P75330          | NM_004966           | heterogeneous nuclear ribonucleoprotein F, transcript variant 3                                                                              | HNRNPF         | 10q11.21      | 1.68        | 1.52E-6         |
| A_23_P111228         | NM_017421           | coenzyme Q3 homolog, methyltransferase ( <i>S. cerevisiae</i> )                                                                              | COQ3           | 6q16.2        | 1.67        | 2.17E-5         |
| A_24_P387609         | NM_030940           | iron-sulfur cluster assembly 1 homolog ( <i>S. cerevisiae</i> )                                                                              | ISCA1          | 9q21.33       | 1.67        | 1.11E-4         |
| A_23_P306507         | NM_033360           | v-Ki-ras2 Kirsten rat sarcoma viral oncogene homolog, transcript variant a                                                                   | KRAS           | 12p12.1       | 1.67        | 1.72E-5         |
| A_23_P216894         | NM_001006617        | mitogen-activated protein kinase associated protein 1, transcript variant 1                                                                  | MAPKAP1        | 9q33.3        | 1.67        | 4.98E-6         |
| A_23_P110345         | NM_012110           | cysteine-rich hydrophobic domain 2                                                                                                           | CHIC2          | 4q12          | 1.67        | 1.77E-4         |
| A_23_P399501         | NM_182470           | pyruvate kinase, muscle, transcript variant 2                                                                                                | PKM2           | 15q23         | 1.67        | 2.24E-4         |
| A_23_P29036          | NM_005534           | interferon gamma receptor 2 (interferon gamma transducer 1)                                                                                  | IFNGR2         | 21q22.11      | 1.66        | 4.10E-4         |
| <b>A_32_P155776</b>  | <b>NR_033885</b>    | <b>POTE ankyrin domain family, member K, pseudogene</b>                                                                                      | <b>POTEKP</b>  | <b>2q21.1</b> | <b>1.66</b> | <b>7.79E-7</b>  |
| A_24_P73669          | NM_002094           | G1 to S phase transition 1, transcript variant 1                                                                                             | GSPT1          | 16p13.13      | 1.65        | 2.63E-7         |
| <b>A_33_P3403044</b> | <b>NM_005911</b>    | <b>methionine adenosyltransferase II, alpha</b>                                                                                              | <b>MAT2A</b>   | <b>2p11.2</b> | <b>1.65</b> | <b>4.84E-11</b> |
| <b>A_33_P3248765</b> | <b>NM_015999</b>    | <b>adiponectin receptor 1, transcript variant 1</b>                                                                                          | <b>ADIPOR1</b> | <b>1q32.1</b> | <b>1.65</b> | <b>7.80E-8</b>  |
| A_23_P115366         | NM_016308           | cytidine monophosphate (UMP-CMP) kinase 1, cytosolic, transcript variant 1                                                                   | CMPK1          | 1p33          | 1.65        | 1.90E-4         |
| A_24_P942630         | NM_001080424        | lysine (K)-specific demethylase 6B                                                                                                           | KDM6B          | 17p13.1       | 1.64        | 4.55E-5         |
| <b>A_24_P410017</b>  | <b>NM_001083538</b> | <b>POTE ankyrin domain family, member E</b>                                                                                                  | <b>POTEE</b>   | <b>2q21.1</b> | <b>1.64</b> | <b>2.61E-9</b>  |
| A_33_P3232562        | NM_005610           | retinoblastoma binding protein 4, transcript variant 1                                                                                       | RBBP4          | 1p35.1        | 1.64        | 1.01E-4         |
| A_32_P22338          | NM_013374           | programmed cell death 6 interacting protein, transcript variant 1                                                                            | PDCD6IP        | 3p22.3        | 1.63        | 1.76E-5         |
| <b>A_24_P228875</b>  | <b>NM_004840</b>    | <b>Rac/Cdc42 guanine nucleotide exchange factor (GEF) 6</b>                                                                                  | <b>ARHGEF6</b> | <b>Xq26.3</b> | <b>1.62</b> | <b>2.84E-9</b>  |
| A_33_P3289835        | ENST00000531819     | oxysterol binding protein-like 9 [Source:HGNC Symbol;Acc:16386]                                                                              | OSBPL9         | 1p32.3        | 1.62        | 8.32E-8         |
| A_23_P156049         | NM_000521           | hexosaminidase B (beta polypeptide)                                                                                                          | HEXB           | 5q13.3        | 1.62        | 2.20E-4         |
| A_33_P3418516        | NM_001949           | E2F transcription factor 3                                                                                                                   | E2F3           | 6p22.3        | 1.61        | 7.01E-6         |
| A_23_P255257         | NM_015397           | DDB1 and CUL4 associated factor 12                                                                                                           | DCAF12         | 9p13.3        | 1.61        | 4.70E-6         |
| A_24_P349039         | NM_020754           | Rho GTPase activating protein 31                                                                                                             | ARHGAP31       | 3q13.33       | 1.60        | 1.17E-4         |
| A_23_P6651           | NM_015224           | chromosome 3 open reading frame 63, transcript variant 2                                                                                     | C3orf63        | 3p14.3        | 1.60        | 1.22E-6         |
| A_24_P418044         | NR_024240           | major histocompatibility complex, class I, J (pseudogene)                                                                                    | HLA-J          | 6p22.1        | 1.60        | 2.05E-4         |
| A_24_P312041         | NM_006718           | pleiomorphic adenoma gene-like 1, transcript variant 2                                                                                       | PLAGL1         | 6q24.2        | 1.59        | 3.42E-4         |
| <b>A_24_P59220</b>   | <b>NM_001099771</b> | <b>POTE ankyrin domain family, member F</b>                                                                                                  | <b>POTEF</b>   | <b>2q21.1</b> | <b>1.59</b> | <b>3.64E-8</b>  |
| A_23_P149892         | NM_018590           | chondroitin sulfate N-acetylgalactosaminyltransferase 2                                                                                      | CSGALNACT2     | 10q11.21      | 1.59        | 2.97E-5         |
| A_33_P3343155        | NM_002072           | guanine nucleotide binding protein (G protein), q polypeptide                                                                                | GNAQ           | 9q21.2        | 1.59        | 1.69E-6         |
| A_23_P16139          | NM_006387           | calcium homeostasis endoplasmic reticulum protein                                                                                            | CHERP          | 19p13.11      | 1.59        | 1.33E-6         |
| A_23_P41292          | NM_001012614        | C-terminal binding protein 1, transcript variant 2                                                                                           | CTBP1          | 4p16.3        | 1.58        | 1.36E-7         |
| A_23_P166135         | NM_012255           | 5'-3' exoribonuclease 2                                                                                                                      | XRN2           | 20p11.23      | 1.58        | 1.78E-8         |



|                    |                  |                                                                                                                                 |             |                |             |                |
|--------------------|------------------|---------------------------------------------------------------------------------------------------------------------------------|-------------|----------------|-------------|----------------|
| A_23_P75516        | NM_003626        | protein tyrosine phosphatase, receptor type, f polypeptide (PTPRF), interacting protein (liprin), alpha 1, transcript variant 2 | PPFIA1      | 11q13.3        | 1.57        | 9.25E-5        |
| A_24_P408424       | NM_002473        | myosin, heavy chain 9, non-muscle                                                                                               | MYH9        | 22q12.3        | 1.56        | 2.80E-5        |
| A_23_P10858        | NM_015114        | ankyrin repeat and LEM domain containing 2                                                                                      | ANKLE2      | 12q24.33       | 1.55        | 1.38E-6        |
| A_23_P118150       | NM_015161        | ADP-ribosylation factor-like 6 interacting protein 1                                                                            | ARL6IP1     | 16p12.3        | 1.55        | 7.12E-6        |
| <b>A_24_P38815</b> | <b>NM_000391</b> | <b>tripeptidyl peptidase I</b>                                                                                                  | <b>TPP1</b> | <b>11p15.4</b> | <b>1.55</b> | <b>1.26E-6</b> |
| A_23_P321201       | NM_015213        | DENN/MADD domain containing 5A                                                                                                  | DENND5A     | 11p15.4        | 1.54        | 1.69E-4        |
| A_23_P250380       | NM_015274        | mannosidase, alpha, class 2B, member 2                                                                                          | MAN2B2      | 4p16.1         | 1.53        | 6.96E-7        |
| A_23_P109928       | NM_014814        | proteasome (prosome, macropain) 26S subunit, non-ATPase, 6                                                                      | PSMD6       | 3p14.1         | 1.53        | 1.65E-6        |
| A_33_P3321230      | NM_052831        | chromosome 6 open reading frame 192                                                                                             | C6orf192    | 6q23.2         | 1.53        | 1.75E-4        |
| A_24_P58337        | NM_002032        | ferritin, heavy polypeptide 1                                                                                                   | FTH1        | 11q12.3        | 1.52        | 5.03E-5        |
| A_23_P115645       | NM_001025076     | CUGBP, Elav-like family member 2, transcript variant 1                                                                          | CELF2       | 10p14          | 1.51        | 1.66E-11       |
| A_23_P110606       | NM_014757        | mastermind-like 1 (Drosophila)                                                                                                  | MAML1       | 5q35.3         | 1.51        | 1.22E-5        |
| A_23_P162228       | NM_005594        | nascent polypeptide-associated complex alpha subunit, transcript variant 3                                                      | NACA        | 12q13.3        | 1.50        | 3.53E-7        |
| A_23_P381449       | NM_003110        | Sp2 transcription factor                                                                                                        | SP2         | 17q21.32       | 1.50        | 7.66E-6        |
| A_23_P98092        | NM_000274        | ornithine aminotransferase, nuclear gene encoding mitochondrial protein, transcript variant 1                                   | OAT         | 10q26.13       | 1.50        | 3.65E-4        |

This list contains 111 genes differentially overexpressed in MDE versus control at baseline. Changes were assessed by a SAM analysis set with a FDR of 5% and then challenged with a t-test ( $FC \geq 1.50$ ;  $p < 0.001$ ). Genes in bold are also significant with a FDR set at 1%.

**Supplementary Table ST6: Underexpressed transcripts in MDE subjects at week 0 compared to controls (weeks 0 and 8)**

| Probe                 | Accession        | Gene description                                                                             | Gene symbol     | Cytoband        | Fold change  | P-value         |
|-----------------------|------------------|----------------------------------------------------------------------------------------------|-----------------|-----------------|--------------|-----------------|
| <b>A_19_P00316854</b> |                  | <b>lincRNA:chr18:53750605-53752602_F</b>                                                     |                 | <b>18q21.2</b>  | <b>-4.21</b> | <b>1.64E-6</b>  |
| A_32_P46594           | NR_026979        | hypothetical LOC145837                                                                       | LOC145837       | 15q23           | -3.39        | 9.00E-4         |
| A_33_P3241145         | BC047414         | cDNA clone IMAGE:5273698                                                                     | BC047414        | 16p11.2         | -3.27        | 5.05E-5         |
| A_33_P3379606         | NM_001029875     | regulator of G-protein signaling 7 binding protein                                           | RGS7BP          | 5q12.3          | -3.13        | 1.01E-5         |
| A_23_P337270          | ENST00000383770  | NIMA (never in mitosis gene a)-related kinase 10 [Source:HGNC Symbol;Acc:18592]              | NEK10           | 3p24.2          | -2.89        | 3.62E-5         |
| A_33_P3274439         | DA109127         | BRACE3 Homo sapiens cDNA clone BRACE3025572 5'                                               | DA109127        | 11q22.3         | -2.81        | 1.31E-5         |
| A_33_P3226542         | NR_003271        | small nucleolar RNA, C/D box 3B-1                                                            | SNORD3B-1       | 17p11.2         | -2.70        | 2.39E-5         |
| <b>A_24_P260639</b>   | <b>NM_005320</b> | <b>histone cluster 1, H1d</b>                                                                | <b>HIST1H1D</b> | <b>6p22.2</b>   | <b>-2.63</b> | <b>1.47E-4</b>  |
| <b>A_33_P3709317</b>  | <b>NR_002964</b> | <b>small nucleolar RNA, H/ACA box 28</b>                                                     | <b>SNORA28</b>  | <b>14q32.32</b> | <b>-2.58</b> | <b>1.64E-9</b>  |
| A_23_P315836          | NM_017451        | BAI1-associated protein 2, transcript variant 2                                              | BAIAP2          | 17q25.3         | -2.57        | 4.52E-5         |
| A_33_P3236392         | NM_030916        | poliovirus receptor-related 4                                                                | PVRL4           | 1q23.3          | -2.52        | 3.90E-4         |
| A_33_P3227551         | ENST00000509069  | zinc finger protein 331                                                                      | ZNF331          | 19q13.41        | -2.49        | 1.51E-4         |
| <b>A_19_P00319456</b> |                  | <b>lincRNA:chr19:53151418-53152966_R</b>                                                     |                 | <b>19q13.33</b> | <b>-2.41</b> | <b>2.17E-5</b>  |
| A_19_P00324238        |                  | lincRNA:chr3:129602510-129611708_R                                                           |                 | 3q21.3          | -2.41        | 4.84E-5         |
| <b>A_19_P00800237</b> |                  | <b>lincRNA:chr19:53149513-53154883_R</b>                                                     |                 | <b>19q13.41</b> | <b>-2.35</b> | <b>1.33E-10</b> |
| <b>A_19_P00810480</b> |                  | <b>lincRNA:chr2:102597068-102606493_F</b>                                                    |                 | <b>2q11.2</b>   | <b>-2.34</b> | <b>9.54E-5</b>  |
| A_23_P67952           | NR_026766        | v-myc myelocytomatosis viral related oncogene, neuroblastoma derived (avian) opposite strand | MYCNOS          | 2p24.1          | -2.31        | 2.32E-4         |
| A_33_P3335366         | NM_018717        | mastermind-like 3 (Drosophila)                                                               | MAML3           | 4q28            | -2.29        | 3.40E-6         |
| A_19_P00808575        |                  | lincRNA:chr14:23018310-23025460_R                                                            |                 | 14q11.2         | -2.26        | 1.04E-6         |
| A_33_P3578325         | NR_000005        | small nucleolar RNA, C/D box 15A                                                             | SNORD15A        | 11q13.4         | -2.25        | 6.84E-5         |
| <b>A_23_P415411</b>   | <b>NM_003545</b> | <b>histone cluster 1, H4e</b>                                                                | <b>HIST1H4E</b> | <b>6p22.2</b>   | <b>-2.23</b> | <b>1.48E-5</b>  |
| A_19_P00813557        |                  | lincRNA:chr1:118374652-118400852_F                                                           |                 | 1p13.1          | -2.22        | 3.32E-6         |
| A_24_P232790          | NR_024630        | chromosome 14 open reading frame 162                                                         | C14orf162       | 14q24.1         | -2.18        | 8.19E-5         |
| <b>A_24_P219378</b>   | <b>NM_020764</b> | <b>CASK interacting protein 1</b>                                                            | <b>CASKIN1</b>  | <b>16p13.3</b>  | <b>-2.17</b> | <b>6.09E-11</b> |
| A_33_P3257678         | NM_001005464     | histone cluster 2, H3a                                                                       | HIST2H3A        | 1q21.2          | -2.15        | 5.60E-5         |
| <b>A_19_P00319448</b> |                  | <b>lincRNA:chr19:53151411-53151829_R</b>                                                     |                 | <b>19q13.33</b> | <b>-2.14</b> | <b>4.46E-6</b>  |
| A_33_P3377763         | NR_027084        | hypothetical FLJ36000                                                                        | FLJ36000        | 17p11.2         | -2.13        | 1.32E-5         |

|                       |                     |                                                                                                     |                 |                |              |                |
|-----------------------|---------------------|-----------------------------------------------------------------------------------------------------|-----------------|----------------|--------------|----------------|
| <b>A_24_P217834</b>   | <b>NM_003530</b>    | <b>histone cluster 1, H3d</b>                                                                       | <b>HIST1H3D</b> | <b>6p22.2</b>  | <b>-2.08</b> | <b>3.17E-5</b> |
| A_33_P3344229         | NM_003538           | histone cluster 1, H4a                                                                              | HIST1H4A        | 6p22.2         | -2.08        | 1.20E-5        |
| A_33_P3214785         | AK094801            | cDNA FLJ37482 fis, clone BRAWH2013941                                                               | LEPROT          | 1p31.3         | -2.05        | 9.43E-7        |
| A_33_P3299781         | ENST00000380201     | DDR GK domain containing 1 [Source:HGNC Symbol;Acc:16110]                                           | DDR GK1         | 20p13          | -2.01        | 2.15E-4        |
| A_19_P00324774        |                     | lincRNA:chr3:13093175-13147525_R                                                                    |                 | 3p25.1         | -2.00        | 2.91E-4        |
| <b>A_19_P00318708</b> |                     | <b>lincRNA:chr17:70442671-70443408_R</b>                                                            |                 | <b>17q24.3</b> | <b>-1.99</b> | <b>1.38E-4</b> |
| <b>A_33_P3318946</b>  | <b>NM_021817</b>    | <b>hyaluronan and proteoglycan link protein 2</b>                                                   | <b>HAPLN2</b>   | <b>1q23.1</b>  | <b>-1.98</b> | <b>1.68E-4</b> |
| A_23_P30799           | NM_021018           | histone cluster 1, H3f                                                                              | HIST1H3F        | 6p22.2         | -1.98        | 7.85E-4        |
| <b>A_23_P7976</b>     | <b>NM_005321</b>    | <b>histone cluster 1, H1e</b>                                                                       | <b>HIST1H1E</b> | <b>6p22.2</b>  | <b>-1.94</b> | <b>6.27E-5</b> |
| A_23_P218784          | NM_006386           | DEAD (Asp-Glu-Ala-Asp) box polypeptide 17, transcript variant 1                                     | DDX17           | 22q13.1        | -1.94        | 4.75E-6        |
| A_23_P70448           | NM_005325           | histone cluster 1, H1a                                                                              | HIST1H1A        | 6p22.2         | -1.93        | 1.66E-6        |
| A_33_P3363082         | NR_003008           | small Cajal body-specific RNA 5                                                                     | SCARNA5         | 2q37.1         | -1.93        | 2.20E-6        |
| A_23_P75790           | NM_013279           | chromosome 11 open reading frame 9, transcript variant 1                                            | C11orf9         | 11q12.2        | -1.90        | 1.28E-4        |
| A_19_P00329774        |                     | lincRNA:chr7:33679675-33695300_F                                                                    |                 | 7p14.3         | -1.88        | 1.26E-4        |
| A_19_P00812282        |                     | lincRNA:chr3:154957056-155055681_F                                                                  |                 | 3q25.2         | -1.86        | 1.42E-7        |
| <b>A_33_P3387931</b>  | <b>NM_001012267</b> | <b>centromere protein P</b>                                                                         | <b>CENPP</b>    | <b>9q22.31</b> | <b>-1.85</b> | <b>2.74E-6</b> |
| <b>A_33_P3812815</b>  | <b>NM_000296</b>    | <b>polycystic kidney disease 1 (autosomal dominant), transcript variant 2</b>                       | <b>PKD1</b>     | <b>16p13.3</b> | <b>-1.84</b> | <b>2.64E-5</b> |
| A_23_P416774          | NM_016929           | chloride intracellular channel 5, nuclear gene encoding mitochondrial protein, transcript variant 2 | CLIC5           | 6p21.1         | -1.84        | 1.41E-4        |
| <b>A_23_P391778</b>   | <b>NM_033044</b>    | <b>microtubule-actin crosslinking factor 1, transcript variant 2</b>                                | <b>MACF1</b>    | <b>1p34.3</b>  | <b>-1.83</b> | <b>6.07E-6</b> |
| <b>A_33_P3382595</b>  | <b>NR_001445</b>    | <b>RNA, 7SK small nuclear</b>                                                                       | <b>RN7SK</b>    | <b>6p12.2</b>  | <b>-1.82</b> | <b>1.24E-6</b> |
| A_24_P273413          | NM_019063           | echinoderm microtubule associated protein like 4, transcript variant 1                              | EML4            | 2p21           | -1.77        | 3.36E-7        |
| A_19_P00802156        |                     | lincRNA:chr6:86386083-86388435_R                                                                    |                 | 6q14.1         | -1.77        | 2.72E-4        |
| A_33_P3304824         | ENST00000435624     | chromosome 14 open reading frame 63                                                                 | C14orf63        | 14q32.2        | -1.76        | 1.87E-4        |
| A_24_P481783          | NM_001163692        | ubiquitin-associated protein 1-like                                                                 | UBAP1L          | 15q22.31       | -1.76        | 3.14E-4        |
| A_19_P00806618        |                     | lincRNA:chr5:1130775-1186275_R                                                                      |                 | 5p15.33        | -1.76        | 5.94E-5        |
| A_33_P3399028         | NM_006852           | tousled-like kinase 2, transcript variant A                                                         | TLK2            | 17q23.2        | -1.75        | 1.42E-5        |
| A_19_P00322542        |                     | lincRNA:chr3:129611381-129612189_R                                                                  |                 | 3q21.3         | -1.75        | 5.31E-6        |
| A_32_P66020           | NM_032167           | sorting nexin 29                                                                                    | SNX29           | 16p13.13       | -1.74        | 1.77E-5        |
| A_23_P502957          | NM_021810           | cadherin 26, transcript variant b                                                                   | CDH26           | 20q13.33       | -1.73        | 5.18E-4        |
| <b>A_33_P3245922</b>  | <b>NM_006724</b>    | <b>mitogen-activated protein kinase kinase kinase 4, transcript variant 2</b>                       | <b>MAP3K4</b>   | <b>6q26</b>    | <b>-1.73</b> | <b>3.53E-6</b> |
| A_33_P3209497         | NP511207            | BAC05833.1 seven transmembrane helix receptor                                                       | NP511207        | 7q34           | -1.72        | 4.65E-4        |
| A_33_P3299865         | NM_003541           | histone cluster 1, H4k                                                                              | HIST1H4K        | 6p22.1         | -1.71        | 2.03E-4        |
| A_19_P00329800        |                     | lincRNA:chr1:204525202-204541352_F                                                                  |                 | 1q32.1         | -1.69        | 9.04E-5        |
| A_33_P3401284         | NR_003051           | RNA component of mitochondrial RNA processing endoribonuclease,                                     | RMRP            | 9p13.3         | -1.68        | 3.53E-7        |

| Accession      | Gene ID         | Gene Name                                                                                 | Gene Symbol | Chromosome | Log2 Fold Change | P-value |
|----------------|-----------------|-------------------------------------------------------------------------------------------|-------------|------------|------------------|---------|
|                |                 | RNase MRP RNA                                                                             |             |            |                  |         |
| A_33_P3254695  | ENST00000363217 | small nucleolar RNA, H/ACA box 73B                                                        | SNORA73B    | 1p35.3     | -1.64            | 4.69E-6 |
| A_33_P3301620  | NM_001184997    | ring finger protein 32, transcript variant 2                                              | RNF32       | 7q36.3     | -1.64            | 1.42E-5 |
| A_33_P3302652  | ENST00000415882 | chromosome 1 open reading frame 132                                                       | C1orf132    | 1q32.1     | -1.64            | 9.45E-6 |
| A_23_P331943   | NM_020823       | transmembrane protein 181                                                                 | TMEM181     | 6q25.3     | -1.63            | 6.22E-5 |
| A_23_P214821   | NM_001955       | endothelin 1, transcript variant 1                                                        | EDN1        | 6p24.1     | -1.63            | 1.23E-4 |
| A_23_P105592   | NM_000431       | mevalonate kinase, transcript variant 1                                                   | MVK         | 12q24.11   | -1.62            | 6.24E-6 |
| A_24_P214598   | NM_152542       | protein phosphatase, Mg2+/Mn2+ dependent, 1K, nuclear gene encoding mitochondrial protein | PPM1K       | 4q22.1     | -1.62            | 1.09E-4 |
| A_24_P163113   | NM_017548       | CDV3 homolog (mouse), transcript variant 2                                                | CDV3        | 3q22.1     | -1.61            | 2.80E-7 |
| A_33_P3339066  | NM_017619       | RNA-binding region (RNP1, RRM) containing 3                                               | RNPC3       | 1p21.1     | -1.61            | 3.39E-4 |
| A_23_P360874   | NM_152892       | leucine-rich repeats and WD repeat domain containing 1                                    | LRWD1       | 7q22.1     | -1.61            | 1.00E-5 |
| A_23_P70480    | NM_003546       | histone cluster 1, H4I                                                                    | HIST1H4L    | 6p22.1     | -1.60            | 9.85E-5 |
| A_33_P3309365  | NR_002314       | solute carrier family 24 (sodium/potassium/calcium exchanger), member 3 pseudogene 1      | SLC25A3P1   | 1p32.3     | -1.59            | 1.18E-4 |
| A_19_P00803182 |                 | lincRNA:chr2:37776096-37862046_R                                                          |             | 2p22.3     | -1.59            | 3.87E-6 |
| A_33_P3218760  | NM_080599       | UPF2 regulator of nonsense transcripts homolog (yeast), transcript variant 1,             | UPF2        | 10p14      | -1.57            | 3.18E-5 |
| A_23_P97283    | NM_024897       | progesterone and adiponectin receptor family member VI, transcript variant 1              | PAQR6       | 1q22       | -1.57            | 1.04E-4 |
| A_23_P97021    | NM_024852       | eukaryotic translation initiation factor 2C, 3, transcript variant 1                      | EIF2C3      | 1p34.3     | -1.57            | 2.50E-5 |
| A_33_P3535175  | BX095413        | NCI_CGAP_Kid3 Homo sapiens cDNA clone IMAGp998P233802                                     | BX095413    | 20p13      | -1.55            | 2.22E-7 |
| A_23_P372874   | NM_001024210    | S100 calcium binding protein A13, transcript variant 1                                    | S100A13     | 1q21.3     | -1.54            | 1.26E-4 |
| A_23_P398275   | NR_027001       | hypothetical LOC388152                                                                    | LOC388152   | 15q25.2    | -1.54            | 7.34E-5 |
| A_32_P106732   | NM_020937       | Fanconi anemia, complementation group M                                                   | FANCM       | 14q21.2    | -1.54            | 1.44E-6 |
| A_23_P89155    | NM_001258       | cyclin-dependent kinase 3                                                                 | CDK3        | 17q25.1    | -1.53            | 2.21E-4 |
| A_33_P3313595  | NM_033487       | cyclin-dependent kinase 11B, transcript variant 3                                         | CDK11B      | 1p36.33    | -1.53            | 9.72E-5 |
| A_23_P59022    | NM_033502       | transcriptional regulating factor 1                                                       | TRERF1      | 6p21.1     | -1.51            | 4.41E-6 |

This list contains 84 genes differentially underexpressed in MDE versus control at baseline. Changes were assessed by a SAM analysis set with a FDR of 5% and then challenged with a t-test ( $FC \geq 1.50$ ;  $p < 0.001$ ). Genes in bold are also significant with a FDR set at 1%.

**Supplementary Table ST7: Overexpressed transcripts in MDE treatment responders at week 8 responding compared to controls (weeks 0 and 8)**

| Probe          | Accession       | Gene description                                                            | Gene symbol | Cytoband | Fold change | P-value  |
|----------------|-----------------|-----------------------------------------------------------------------------|-------------|----------|-------------|----------|
| A_24_P461497   | XM_002343637    | PREDICTED: similar to cytoskeletal beta actin                               | LOC646048   | 19p13.2  | 2.41        | 5.11E-6  |
| A_23_P407096   | NM_152625       | zinc finger protein 366                                                     | ZNF366      | 5q13.2   | 2.36        | 1.28E-5  |
| A_24_P276628   | NM_000310       | palmitoyl-protein thioesterase 1, transcript variant 1                      | PPT1        | 1p34.2   | 2.22        | 1.93E-8  |
| A_33_P3248765  | NM_015999       | adiponectin receptor 1, transcript variant 1                                | ADIPOR1     | 1q32.1   | 2.15        | 3.18E-5  |
| A_33_P3403418  | NM_001903       | catenin (cadherin-associated protein), alpha 1, 102kDa                      | CTNNA1      | 5q31.2   | 2.11        | 8.88E-5  |
| A_19_P00806748 |                 | lincRNA:chr6:139809107-140148457_F                                          |             | 6q24.1   | 2.10        | 1.86E-4  |
| A_23_P145035   | NM_153042       | lysine (K)-specific demethylase 1B                                          | KDM1B       | 6p22.3   | 2.05        | 8.47E-5  |
| A_33_P3382236  | NM_018330       | KIAA1598, transcript variant 2                                              | KIAA1598    | 10q25.3  | 2.05        | 6.44E-3  |
| A_24_P156049   | NM_012319       | solute carrier family 39 (zinc transporter), member 6, transcript variant 1 | SLC39A6     | 18q12.2  | 2.05        | 6.04E-5  |
| A_23_P500364   | NM_001707       | B-cell CLL/lymphoma 7B, transcript variant 1                                | BCL7B       | 7q11.23  | 2.00        | 1.77E-4  |
| A_23_P396777   | NM_006315       | polycomb group ring finger 3                                                | PCGF3       | 4p16.3   | 2.00        | 1.64E-4  |
| A_23_P122375   | NM_021943       | zinc finger, AN1-type domain 3                                              | ZFAND3      | 6p21.2   | 2.00        | 2.35E-8  |
| A_23_P379020   | NR_002328       | gonadotropin-releasing hormone (type 2) receptor 2                          | GNRHR2      | 1q21.1   | 1.98        | 8.43E-9  |
| A_24_P383901   | XR_017601       | PREDICTED: similar to Actin, cytoplasmic 1                                  | LOC391334   | 22q13.2  | 1.96        | 1.20E-7  |
| A_24_P312041   | NM_006718       | pleiomorphic adenoma gene-like 1, transcript variant 2                      | PLAGL1      | 6q24.2   | 1.95        | 8.33E-10 |
| A_23_P37988    | NM_152727       | copine II                                                                   | CPNE2       | 16q13    | 1.93        | 1.20E-5  |
| A_24_P16856    | ENST00000381261 | A kinase (PRKA) anchor protein 17A [Source:HGNC Symbol;Acc:18783]           | AKAP17A     | Xp22.33  | 1.91        | 3.27E-6  |
| A_33_P3331307  | NM_006449       | CDC42 effector protein (Rho GTPase binding) 3                               | CDC42EP3    | 2p22.2   | 1.90        | 1.06E-4  |
| A_23_P105571   | NM_020244       | choline phosphotransferase 1                                                | CHPT1       | 12q23.2  | 1.86        | 1.74E-6  |
| A_24_P272761   | NM_020946       | DENN/MADD domain containing 1A, transcript variant 1                        | DENND1A     | 9q33.3   | 1.86        | 4.72E-5  |
| A_23_P53557    | NM_002342       | lymphotoxin beta receptor (TNFR superfamily, member 3)                      | LTBR        | 12p13.31 | 1.85        | 1.14E-5  |
| A_33_P3410093  | NM_000895       | leukotriene A4 hydrolase                                                    | LTA4H       | 12q23.1  | 1.80        | 2.04E-5  |
| A_24_P70888    | NM_012401       | plexin B2                                                                   | PLXNB2      | 22q13.33 | 1.80        | 3.76E-5  |
| A_23_P217564   | NM_004458       | acyl-CoA synthetase long-chain family member 4, transcript variant 1        | ACSL4       | Xq23     | 1.76        | 3.52E-4  |
| A_24_P6903     | NM_001017992    | actin, beta-like 2                                                          | ACTBL2      | 5q11.2   | 1.76        | 5.68E-9  |
| A_23_P156049   | NM_000521       | hexosaminidase B (beta polypeptide)                                         | HEXB        | 5q13.3   | 1.76        | 6.71E-8  |
| A_23_P149892   | NM_018590       | chondroitin sulfate N-acetylgalactosaminyltransferase 2                     | CSGALNACT2  | 10q11.21 | 1.73        | 7.68E-7  |

|                |                |                                                                                            |              |          |      |         |
|----------------|----------------|--------------------------------------------------------------------------------------------|--------------|----------|------|---------|
| A_23_P355455   | NM_014744      | TBC1 domain family, member 5, transcript variant 2                                         | TBC1D5       | 3p24.3   | 1.73 | 1.28E-4 |
| A_24_P14367    | NM_002819      | polypyrimidine tract binding protein 1, transcript variant 1                               | PTBP1        | 19p13.3  | 1.72 | 3.68E-4 |
| A_33_P3406927  | NM_031284      | ADP-dependent glucokinase, transcript variant 1                                            | ADPGK        | 15q24.1  | 1.71 | 4.82E-6 |
| A_19_P00803502 |                | lincRNA:chr4:8490675-8515950_F                                                             |              | 4p16.1   | 1.70 | 3.96E-5 |
| A_33_P3223503  | NM_023037      | furry homolog (Drosophila)                                                                 | FRY          | 13q13.1  | 1.70 | 6.75E-6 |
| A_23_P75330    | NM_004966      | heterogeneous nuclear ribonucleoprotein F, transcript variant 3                            | HNRNPF       | 10q11.21 | 1.70 | 1.78E-5 |
| A_32_P22338    | NM_013374      | programmed cell death 6 interacting protein, transcript variant 1                          | PDCD6IP      | 3p22.3   | 1.70 | 4.98E-6 |
| A_24_P141786   | NM_001681      | ATPase, Ca <sup>++</sup> transporting, cardiac muscle, slow twitch 2, transcript variant 2 | ATP2A2       | 12q24.11 | 1.68 | 2.03E-4 |
| A_23_P321388   | NM_153341      | ring finger protein 19B (RNF19B), transcript variant 1, mRNA [NM_153341]                   | RNF19B       | 1p35.1   | 1.68 | 2.92E-6 |
| A_33_P3343155  | NM_002072      | guanine nucleotide binding protein (G protein), q polypeptide                              | GNAQ         | 9q21.2   | 1.67 | 1.87E-6 |
| A_32_P95823    | NM_014607      | UBX domain protein 4                                                                       | UBXN4        | 2q21.3   | 1.66 | 2.25E-7 |
| A_23_P83098    | NM_000689      | aldehyde dehydrogenase 1 family, member A1                                                 | ALDH1A1      | 9q21.13  | 1.64 | 3.14E-5 |
| A_33_P3289835  | ENST0000053189 | oxysterol binding protein-like 9 [Source:HGNC Symbol;Acc:16386]                            | OSBPL9       | 1p32.3   | 1.64 | 3.38E-9 |
| A_24_P410017   | NM_001083538   | POTE ankyrin domain family, member E                                                       | POTEE        | 2q21.1   | 1.64 | 1.01E-9 |
| A_23_P17855    | NM_001039141   | TRIO and F-actin binding protein, transcript variant 6                                     | TRIOBP       | 22q13.1  | 1.63 | 3.89E-6 |
| A_24_P387609   | NM_030940      | iron-sulfur cluster assembly 1 homolog (S. cerevisiae)                                     | ISCA1        | 9q21.33  | 1.62 | 3.79E-6 |
| A_32_P209624   | NR_026640      | makorin ring finger protein 1 pseudogene                                                   | LOC100240726 | 20q13.11 | 1.62 | 9.57E-5 |
| A_32_P155776   | NR_033885      | POTE ankyrin domain family, member K, pseudogene                                           | POTEKP       | 2q21.1   | 1.61 | 5.05E-8 |
| A_33_P3385870  | NM_004354      | cyclin G2                                                                                  | CCNG2        | 4q21.1   | 1.60 | 2.12E-6 |
| A_23_P133438   | NM_019018      | family with sequence similarity 105, member A                                              | FAM105A      | 5p15.2   | 1.60 | 4.66E-5 |
| A_23_P37598    | NM_012428      | neuroplastin (NPTN), transcript variant b                                                  | NPTN         | 15q24.1  | 1.59 | 3.17E-6 |
| A_33_P3321230  | NM_052831      | chromosome 6 open reading frame 192                                                        | C6orf192     | 6q23.2   | 1.58 | 2.05E-5 |
| A_24_P408457   | NM_000262      | N-acetylgalactosaminidase, alpha                                                           | NAGA         | 22q13.2  | 1.57 | 2.56E-5 |
| A_23_P426809   | NM_198236      | Rho guanine nucleotide exchange factor (GEF) 11, transcript variant 2                      | ARHGEF11     | 1q23.1   | 1.55 | 4.80E-5 |
| A_24_P391368   | NM_013236      | ataxin 10, transcript variant 1                                                            | ATXN10       | 22q13.31 | 1.55 | 6.73E-5 |
| A_23_P134347   | NM_019029      | carboxypeptidase, vitellogenic-like, transcript variant 2                                  | CPVL         | 7p14.3   | 1.55 | 9.48E-5 |
| A_23_P206324   | NM_031463      | hydroxysteroid dehydrogenase like 1, transcript variant 1                                  | HSDL1        | 16q23.3  | 1.54 | 1.55E-4 |
| A_23_P118427   | NM_145109      | mitogen-activated protein kinase kinase 3, transcript variant B                            | MAP2K3       | 17p11.2  | 1.53 | 8.85E-5 |
| A_23_P216894   | NM_001006617   | mitogen-activated protein kinase associated protein 1, transcript variant 1                | MAPKAP1      | 9q33.3   | 1.51 | 4.78E-6 |
| A_24_P38815    | NM_000391      | tripeptidyl peptidase I                                                                    | TPP1         | 11p15.4  | 1.51 | 6.56E-8 |
| A_24_P228875   | NM_004840      | Rac/Cdc42 guanine nucleotide exchange factor (GEF) 6                                       | ARHGEF6      | Xq26.3   | 1.50 | 6.10E-5 |

This list contains 58 genes differentially overexpressed in MDE at 8-week of follow-up versus control. Changes were assessed by a SAM analysis

set with a FDR of 5% and then challenged with a t-test ( $FC \geq 1.50$ ;  $p < 0.001$ ).

**Supplementary Table ST8: Underexpressed transcripts in MDE treatment responders at week 8 compared to controls (weeks 0 and 8)**

| Probe                 | Accession        | Gene description                                                             | Gene symbol     | Cytoband        | Fold change  | P-value         |
|-----------------------|------------------|------------------------------------------------------------------------------|-----------------|-----------------|--------------|-----------------|
| A_23_P501538          | NM_153631        | homeobox A3, transcript variant 2                                            | HOXA3           | 7p15.2          | -5.10        | 4.12E-4         |
| A_24_P217834          | NM_003530        | histone cluster 1, H3d                                                       | HIST1H3D        | 6p22.2          | -2.04        | 2.23E-7         |
| A_33_P3355266         | NM_022164        | tubulointerstitial nephritis antigen-like 1                                  | TINAGL1         | 1p35.2          | -2.06        | 7.25E-6         |
| A_33_P3578325         | NR_000005        | small nucleolar RNA, C/D box 15A                                             | SNORD15A        | 11q13.4         | -2.09        | 1.14E-6         |
| <b>A_33_P3236392</b>  | <b>NM_030916</b> | <b>poliovirus receptor-related 4</b>                                         | <b>PVRL4</b>    | <b>1q23.3</b>   | <b>-3.13</b> | <b>2.48E-7</b>  |
| A_19_P00808575        |                  | lincRNA:chr14:23018310-23025460_R                                            |                 | 14q11.2         | -2.13        | 1.33E-6         |
| <b>A_19_P00316854</b> |                  | <b>lincRNA:chr18:53750605-53752602_F</b>                                     |                 | <b>18q21.2</b>  | <b>-4.19</b> | <b>3.03E-5</b>  |
| <b>A_23_P415411</b>   | <b>NM_003545</b> | <b>histone cluster 1, H4e</b>                                                | <b>HIST1H4E</b> | <b>6p22.2</b>   | <b>-2.18</b> | <b>9.99E-10</b> |
| <b>A_24_P219378</b>   | <b>NM_020764</b> | <b>CASK interacting protein 1</b>                                            | <b>CASKIN1</b>  | <b>16p13.3</b>  | <b>-2.22</b> | <b>3.75E-9</b>  |
| A_32_P210202          | NM_203394        | E2F transcription factor 7                                                   | E2F7            | 12q21.2         | -2.25        | 2.14E-5         |
| A_19_P00805446        |                  | lincRNA:chr3:88108419-88178191_R                                             |                 | 3p12.1          | -3.27        | 7.00E-5         |
| A_24_P260639          | NM_005320        | histone cluster 1. H1d                                                       | HIST1H1D        | 6p22.2          | -2.26        | 3.49E-6         |
| <b>A_19_P00810480</b> |                  | <b>lincRNA:chr2:102597068-102606493_F</b>                                    |                 | <b>2q11.2</b>   | <b>-2.49</b> | <b>1.14E-7</b>  |
| A_33_P3709317         | NR_002964        | small nucleolar RNA, H/ACA box 28                                            | SNORA28         | 14q32.32        | -2.49        | 3.68E-6         |
| A_19_P00317666        |                  | lincRNA:chr6:86387046-86387917_F                                             |                 | 6q14.1          | -1.50        | 2.95E-6         |
| A_23_P391778          | NM_033044        | microtubule-actin crosslinking factor 1, transcript variant 2                | MACF1           | 1p34.3          | -1.50        | 1.30E-5         |
| A_23_P256933          | NM_000986        | ribosomal protein L24                                                        | RPL24           | 3q12.3          | -1.52        | 1.86E-5         |
| A_33_P3376379         | NM_001139459     | consortin, connexin sorting protein, transcript variant 2                    | CNST            | 1q44            | -1.54        | 1.21E-4         |
| A_33_P3399028         | NM_006852        | tousled-like kinase 2, transcript variant A                                  | TLK2            | 17q23.2         | -1.54        | 9.79E-6         |
| A_33_P3297205         | NM_024627        | chromosome 22 open reading frame 29                                          | C22orf29        | 22q11.21        | -1.55        | 5.77E-5         |
| A_33_P3299781         | ENST00000380201  | DDRGK domain containing 1 [Source:HGNC Symbol;Acc:16110]                     | DDRGK1          | 20p13           | -1.55        | 6.66E-5         |
| A_33_P3230090         | NM_001128619     | leucine zipper protein 6                                                     | LUZP6           | 7q33            | -1.55        | 6.42E-6         |
| A_33_P3218760         | NM_080599        | UPF2 regulator of nonsense transcripts homolog (yeast), transcript variant 1 | UPF2            | 10p14           | -1.55        | 1.00E-4         |
| A_24_P216253          | NM_014902        | discs, large (Drosophila) homolog-associated protein 4, transcript variant 1 | DLGAP4          | 20q11.23        | -1.56        | 2.09E-5         |
| A_33_P3408962         | XR_110352        | PREDICTED: hypothetical protein FLJ33996                                     | FLJ33996        | 12q13.11-q13.12 | -1.56        | 1.13E-5         |
| A_23_P70480           | NM_003546        | histone cluster 1, H4l                                                       | HIST1H4L        | 6p22.1          | -1.57        | 7.42E-5         |
| A_24_P199655          | NM_138959        | vang-like 1 (van gogh, Drosophila), transcript variant 1                     | VANGL1          | 1p13.1          | -1.57        | 5.20E-5         |
| A_32_P106732          | NM_020937        | Fanconi anemia, complementation group M                                      | FANCM           | 14q21.2         | -1.59        | 1.11E-8         |

|                |                 |                                                                                                     |          |         |       |         |
|----------------|-----------------|-----------------------------------------------------------------------------------------------------|----------|---------|-------|---------|
| A_33_P3302652  | ENST00000415882 | chromosome 1 open reading frame 132                                                                 | C1orf132 | 1q32.1  | -1.60 | 4.84E-5 |
| A_33_P3299865  | NM_003541       | histone cluster 1, H4k                                                                              | HIST1H4K | 6p22.1  | -1.60 | 1.95E-6 |
| A_24_P233078   | NR_003064       | peptide YY, 2 (seminalplasmin)                                                                      | PYY2     | 17q11.2 | -1.60 | 1.03E-5 |
| A_23_P98410    | NM_000073       | CD3g molecule, gamma (CD3-TCR complex)                                                              | CD3G     | 11q23.3 | -1.61 | 4.03E-5 |
| A_33_P3290909  | NM_006306       | structural maintenance of chromosomes 1A                                                            | SMC1A    | Xp11.22 | -1.62 | 1.87E-4 |
| A_33_P3254695  | ENST00000363217 | small nucleolar RNA, H/ACA box 73B                                                                  | SNORA73B | 1p35.3  | -1.64 | 1.73E-7 |
| A_33_P3395274  | NM_175907       | zinc binding alcohol dehydrogenase domain containing 2                                              | ZADH2    | 18q22.3 | -1.64 | 2.10E-5 |
| A_19_P00809635 |                 | lincRNA:chr21:16633404-16851904_F                                                                   |          | 21q21.1 | -1.65 | 3.61E-6 |
| A_24_P411186   | NM_022893       | B-cell CLL/lymphoma 11A (zinc finger protein), transcript variant 1                                 | BCL11A   | 2p16.1  | -1.66 | 4.30E-5 |
| A_23_P218784   | NM_006386       | DEAD (Asp-Glu-Ala-Asp) box polypeptide 17, transcript variant 1                                     | DDX17    | 22q13.1 | -1.66 | 4.77E-6 |
| A_23_P97021    | NM_024852       | eukaryotic translation initiation factor 2C, 3, transcript variant 1                                | EIF2C3   | 1p34.3  | -1.66 | 1.15E-9 |
| A_23_P7976     | NM_005321       | histone cluster 1, H1e                                                                              | HIST1H1E | 6p22.2  | -1.66 | 4.60E-6 |
| A_19_P00322225 |                 | lincRNA:chr6:53493403-53495987_F                                                                    |          | 6p12.2  | -1.71 | 2.54E-4 |
| A_19_P00329774 |                 | lincRNA:chr7:33679675-33695300_F                                                                    |          | 7p14.3  | -1.71 | 1.88E-4 |
| A_33_P3812815  | NM_000296       | polycystic kidney disease 1 (autosomal dominant), transcript variant 2                              | PKD1     | 16p13.3 | -1.71 | 1.85E-8 |
| A_23_P30799    | NM_021018       | histone cluster 1, H3f                                                                              | HIST1H3F | 6p22.2  | -1.72 | 7.58E-6 |
| A_23_P99515    | NM_032849       | chromosome 13 open reading frame 33                                                                 | C13orf33 | 13q12.3 | -2.74 | 4.50E-4 |
| A_23_P30805    | NM_021968       | histone cluster 1, H4j                                                                              | HIST1H4J | 6p22.1  | -1.73 | 3.16E-5 |
| A_33_P3363082  | NR_003008       | small Cajal body-specific RNA 5                                                                     | SCARNA5  | 2q37.1  | -1.73 | 1.68E-8 |
| A_23_P75790    | NM_013279       | chromosome 11 open reading frame 9, transcript variant 1                                            | C11orf9  | 11q12.2 | -1.74 | 8.71E-7 |
| A_33_P3241741  | NR_002962       | small nucleolar RNA, H/ACA box 23                                                                   | SNORA23  | 11p15.4 | -1.74 | 2.32E-4 |
| A_33_P3245922  | NM_006724       | mitogen-activated protein kinase kinase kinase 4, transcript variant 2                              | MAP3K4   | 6q26    | -1.76 | 1.05E-4 |
| A_19_P00324238 |                 | lincRNA:chr3:129602510-129611708_R                                                                  |          | 3q21.3  | -1.77 | 1.20E-6 |
| A_19_P00812171 |                 | lincRNA:chr3:88177960-88183660_R                                                                    |          | 3p11.1  | -2.78 | 7.09E-5 |
| A_19_P00808067 |                 | lincRNA:chr7:102025498-102034795_R                                                                  |          | 7q22.1  | -1.77 | 1.29E-4 |
| A_33_P3387931  | NM_001012267    | centromere protein P                                                                                | CENPP    | 9q22.31 | -1.78 | 1.31E-7 |
| A_19_P00329800 |                 | lincRNA:chr1:204525202-204541352_F                                                                  |          | 1q32.1  | -1.80 | 2.78E-7 |
| A_23_P11005    | NM_014272       | ADAM metalloproteinase with thrombospondin type 1 motif, 7                                          | ADAMTS7  | 15q25.1 | -1.80 | 1.70E-4 |
| A_23_P214821   | NM_001955       | endothelin 1, transcript variant 1                                                                  | EDN1     | 6p24.1  | -1.81 | 3.15E-6 |
| A_33_P3343828  | AK126677        | cDNA FLJ44722 fis, clone BRACE3022847                                                               | FLJ42627 | 16p13.3 | -1.81 | 2.78E-4 |
| A_33_P3382595  | NR_001445       | RNA, 7SK small nuclear                                                                              | RN7SK    | 6p12.2  | -1.81 | 6.12E-7 |
| A_19_P00808072 |                 | lincRNA:chr14:101538287-101539271_R                                                                 |          | 14q32.2 | -1.82 | 4.44E-5 |
| A_33_P3402725  | NM_018489       | ash1 (absent, small, or homeotic)-like (Drosophila)                                                 | ASH1L    | 1q22    | -1.84 | 4.27E-6 |
| A_23_P416774   | NM_016929       | chloride intracellular channel 5, nuclear gene encoding mitochondrial protein, transcript variant 2 | CLIC5    | 6p21.1  | -1.84 | 3.92E-5 |



|                       |                 |                                      |                 |               |              |                |
|-----------------------|-----------------|--------------------------------------|-----------------|---------------|--------------|----------------|
| A_33_P3381292         | ENST00000404197 |                                      | ENST00000404197 | 11q13.2       | -1.84        | 3.54E-5        |
| A_33_P3350202         | NM_014484       | molybdenum cofactor synthesis 3      | MOCS3           | 20q13.13      | -1.85        | 2.97E-5        |
| A_33_P3295148         | AK128169        | chromosome 10 open reading frame 102 | C10orf102       | 10q22.1       | -1.86        | 7.69E-5        |
| A_23_P502957          | NM_021810       | cadherin 26, transcript variant b    | CDH26           | 20q13.33      | -1.86        | 1.36E-4        |
| A_19_P00812282        |                 | lincRNA:chr3:154957056-155055681_F   |                 | 3q25.2        | -1.87        | 2.07E-8        |
| <b>A_19_P00322784</b> |                 | <b>lincRNA:chr4:43995-46718_R</b>    |                 | <b>4p16.3</b> | <b>-2.90</b> | <b>8.42E-5</b> |
| A_23_P122443          | NM_005319       | histone cluster 1, H1c               | HIST1H1C        | 6p22.2        | -1.90        | 2.14E-5        |
| A_19_P00318366        |                 | lincRNA:chr3:197338442-197350253_F   |                 | 3q29          | -2.93        | 3.78E-4        |
| A_23_P70968           | NM_006896       | homeobox A7                          | HOXA7           | 7p15.2        | -3.97        | 4.34E-4        |
| A_33_P3344229         | NM_003538       | histone cluster 1, H4a               | HIST1H4A        | 6p22.2        | -1.97        | 2.60E-6        |
| A_33_P3335366         | NM_018717       | mastermind-like 3 (Drosophila)       | MAML3           | 4q28          | -1.98        | 2.19E-4        |

This list contains 73 genes differentially underexpressed in MDE at baseline versus control. Changes were assessed by a SAM analysis set with a FDR of 5% and then challenged with a t-test ( $FC \geq 1.50$ ;  $p < 0.001$ ). Genes in bold are also significant with a FDR set at 1%.

**Supplementary Table ST9: Overexpressed transcripts in MDE treatment responders (weeks 0 and 8) compared to controls (weeks 0 and 8)**

| Probe         | Accession       | Gene description                                                                           | Gene symbol | Cytoband | Fold change | P-value  |
|---------------|-----------------|--------------------------------------------------------------------------------------------|-------------|----------|-------------|----------|
| A_24_P276628  | NM_000310       | palmitoyl-protein thioesterase 1, transcript variant 1                                     | PPT1        | 1p34.2   | 2.26        | 1.15E-11 |
| A_23_P396777  | NM_006315       | polycomb group ring finger 3                                                               | PCGF3       | 4p16.3   | 2.22        | 9.09E-8  |
| A_33_P3403418 | NM_001903       | catenin (cadherin-associated protein), alpha 1, 102kDa                                     | CTNNA1      | 5q31.2   | 2.17        | 7.08E-8  |
| A_24_P156049  | NM_012319       | solute carrier family 39 (zinc transporter), member 6, transcript variant 1                | SLC39A6     | 18q12.2  | 2.06        | 7.58E-8  |
| A_23_P37988   | NM_152727       | copine II                                                                                  | CPNE2       | 16q13    | 1.97        | 3.36E-9  |
| A_24_P383901  | XR_017601       | PREDICTED: similar to Actin, cytoplasmic 1                                                 | LOC391334   | 22q13.2  | 1.92        | 3.79E-13 |
| A_23_P122375  | NM_021943       | zinc finger, AN1-type domain 3                                                             | ZFAND3      | 6p21.2   | 1.91        | 1.88E-10 |
| A_24_P272761  | NM_020946       | DENN/MADD domain containing 1A, transcript variant 1                                       | DENND1A     | 9q33.3   | 1.89        | 4.95E-9  |
| A_24_P312041  | NM_006718       | pleiomorphic adenoma gene-like 1, transcript variant 2                                     | PLAGL1      | 6q24.2   | 1.89        | 3.90E-9  |
| A_24_P14367   | NM_002819       | polypyrimidine tract binding protein 1, transcript variant 1                               | PTBP1       | 19p13.3  | 1.84        | 4.42E-7  |
| A_23_P217564  | NM_004458       | acyl-CoA synthetase long-chain family member 4, transcript variant 1                       | ACSL4       | Xq23     | 1.82        | 2.91E-8  |
| A_23_P355455  | NM_014744       | TBC1 domain family, member 5, transcript variant 2                                         | TBC1D5      | 3p24.3   | 1.79        | 1.42E-9  |
| A_23_P105571  | NM_020244       | choline phosphotransferase 1                                                               | CHPT1       | 12q23.2  | 1.78        | 2.21E-6  |
| A_23_P156049  | NM_000521       | hexosaminidase B (beta polypeptide)                                                        | HEXB        | 5q13.3   | 1.73        | 3.58E-8  |
| A_24_P6903    | NM_001017992    | actin, beta-like 2                                                                         | ACTBL2      | 5q11.2   | 1.72        | 4.92E-11 |
| A_33_P3248765 | NM_015999       | adiponectin receptor 1, transcript variant 1                                               | ADIPOR1     | 1q32.1   | 1.71        | 4.28E-9  |
| A_23_P149892  | NM_018590       | chondroitin sulfate N-acetylgalactosaminyltransferase 2                                    | CSGALNACT2  | 10q11.21 | 1.71        | 3.38E-10 |
| A_33_P3343155 | NM_002072       | guanine nucleotide binding protein (G protein), q polypeptide                              | GNAQ        | 9q21.2   | 1.70        | 1.07E-8  |
| A_23_P75330   | NM_004966       | heterogeneous nuclear ribonucleoprotein F, transcript variant 3                            | HNRNPF      | 10q11.21 | 1.69        | 4.42E-10 |
| A_23_P133438  | NM_019018       | family with sequence similarity 105, member A                                              | FAM105A     | 5p15.2   | 1.66        | 7.28E-10 |
| A_32_P22338   | NM_013374       | programmed cell death 6 interacting protein, transcript variant 1                          | PDCD6IP     | 3p22.3   | 1.66        | 7.10E-9  |
| A_24_P387609  | NM_030940       | iron-sulfur cluster assembly 1 homolog ( <i>S. cerevisiae</i> )                            | ISCA1       | 9q21.33  | 1.64        | 5.97E-6  |
| A_24_P410017  | NM_001083538    | POTE ankyrin domain family, member E                                                       | POTEE       | 2q21.1   | 1.64        | 2.93E-13 |
| A_33_P3289835 | ENST00000531819 | oxysterol binding protein-like 9 [Source:HGNC Symbol;Acc:16386]                            | OSBPL9      | 1p32.3   | 1.63        | 5.06E-10 |
| A_32_P155776  | NR_033885       | POTE ankyrin domain family, member K, pseudogene                                           | POTEKP      | 2q21.1   | 1.63        | 2.14E-13 |
| A_24_P141786  | NM_001681       | ATPase, Ca <sup>++</sup> transporting, cardiac muscle, slow twitch 2, transcript variant 2 | ATP2A2      | 5q11.2   | 1.62        | 1.89E-8  |
| A_23_P37598   | NM_012428       | neuroplastin, transcript variant b                                                         | NPTN        | 15q24.1  | 1.62        | 1.06E-10 |

|               |              |                                                                             |          |         |      |          |
|---------------|--------------|-----------------------------------------------------------------------------|----------|---------|------|----------|
| A_23_P216894  | NM_001006617 | mitogen-activated protein kinase associated protein 1, transcript variant 1 | MAPKAP1  | 9q33.3  | 1.61 | 1.07E-7  |
| A_33_P3321230 | NM_052831    | chromosome 6 open reading frame 192                                         | C6orf192 | 6q23.2  | 1.58 | 8.53E-8  |
| A_24_P228875  | NM_004840    | Rac/Cdc42 guanine nucleotide exchange factor (GEF) 6                        | ARHGEF6  | Xq23    | 1.57 | 1.89E-9  |
| A_24_P38815   | NM_000391    | tripeptidyl peptidase I                                                     | TPP1     | 11p15.4 | 1.54 | 1.96E-12 |

This list contains 31 genes differentially overexpressed in MDE at both baseline and at 8-weeks versus control. Changes were assessed by a

SAM analysis set with a FDR of 5% and then challenged with a t-test ( $FC \geq 1.50$ ;  $p < 0.001$ ).

**Supplementary Table ST10: Underexpressed transcripts in MDE treatment responders (weeks 0 and 8) compared to controls (weeks 0 and 8)**

| Probe                 | Accession        | Gene description                                                                                    | Gene symbol     | Cytoband       | Fold change  | P-value         |
|-----------------------|------------------|-----------------------------------------------------------------------------------------------------|-----------------|----------------|--------------|-----------------|
| A_19_P00316854        |                  | lincRNA:chr18:53750605-53752602_F                                                                   |                 | 18q21.2        | -4.20        | 2.52E-10        |
| A_33_P3236392         | NM_030916        | poliovirus receptor-related 4                                                                       | PVRL4           | 1q23.3         | -3.12        | 1.02E-8         |
| A_33_P3709317         | NR_002964        | small nucleolar RNA, H/ACA box 28                                                                   | SNORA28         | 14q32.32       | -2.50        | 6.89E-11        |
| <b>A_19_P00810480</b> |                  | <b>lincRNA:chr2:102597068-102606493_F</b>                                                           |                 | <b>2q11.2</b>  | <b>-2.43</b> | <b>1.05E-10</b> |
| A_24_P260639          | NM_005320        | histone cluster 1, H1d                                                                              | HIST1H1D        | 6p22.2         | -2.30        | 1.44E-9         |
| <b>A_24_P219378</b>   | <b>NM_020764</b> | <b>CASK interacting protein 1</b>                                                                   | <b>CASKIN1</b>  | <b>16p13.3</b> | <b>-2.20</b> | <b>1.52E-13</b> |
| <b>A_23_P415411</b>   | <b>NM_003545</b> | <b>histone cluster 1, H4e</b>                                                                       | <b>HIST1H4E</b> | <b>6p22.2</b>  | <b>-2.20</b> | <b>4.23E-13</b> |
| A_33_P3578325         | NR_000005        | small nucleolar RNA, C/D box 15A                                                                    | SNORD15A        | 11q13.4        | -2.19        | 3.89E-9         |
| A_19_P00808575        |                  | lincRNA:chr14:23018310-23025460_R                                                                   |                 | 14q11.2        | -2.16        | 5.16E-12        |
| A_33_P3335366         | NM_018717        | mastermind-like 3 (Drosophila)                                                                      | MAML3           | 4q28           | -2.08        | 3.04E-8         |
| A_24_P217834          | NM_003530        | histone cluster 1, H3d                                                                              | HIST1H3D        | 6p22.2         | -2.05        | 3.61E-11        |
| A_33_P3344229         | NM_003538        | histone cluster 1, H4a                                                                              | HIST1H4A        | 6p22.2         | -2.05        | 1.79E-8         |
| A_33_P3363082         | NR_003008        | small Cajal body-specific RNA 5                                                                     | SCARNA5         | 2q37.1         | -1.90        | 2.96E-12        |
| A_23_P75790           | NM_013279        | chromosome 11 open reading frame 9, transcript variant 1                                            | C11orf9         | 11q12.2        | -1.88        | 1.52E-8         |
| A_19_P00329774        |                  | lincRNA:chr7:33679675-33695300_F                                                                    |                 | 7p14.3         | -1.87        | 3.31E-8         |
| A_19_P00812282        |                  | lincRNA:chr3:154957056-155055681_F                                                                  |                 | 3q25.2         | -1.86        | 1.75E-14        |
| A_19_P00324238        |                  | lincRNA:chr3:129602510-129611708_R                                                                  |                 | 3q21.3         | -1.85        | 1.17E-8         |
| A_23_P416774          | NM_016929        | chloride intracellular channel 5, nuclear gene encoding mitochondrial protein, transcript variant 2 | CLIC5           | 6p21.1         | -1.84        | 9.93E-8         |
| A_23_P30799           | NM_021018        | histone cluster 1, H3f                                                                              | HIST1H3F        | 6p22.2         | -1.83        | 6.41E-8         |
| A_33_P3387931         | NM_001012267     | centromere protein P                                                                                | CENPP           | 9q22.31        | -1.82        | 1.40E-12        |
| A_33_P3382595         | NR_001445        | RNA, 7SK small nuclear                                                                              | RN7SK           | 6p12.2         | -1.81        | 2.06E-13        |
| A_23_P502957          | NM_021810        | cadherin 26, transcript variant b                                                                   | CDH26           | 20q13.33       | -1.80        | 3.06E-7         |
| A_23_P391778          | NM_033044        | microtubule-actin crosslinking factor 1, transcript variant 2                                       | MACF1           | 1p34.3         | -1.80        | 1.50E-10        |
| A_33_P3812815         | NM_000296        | polycystic kidney disease 1 (autosomal dominant)                                                    | PKD1            | 16p13.3        | -1.75        | 6.14E-11        |
| A_23_P7976            | NM_005321        | histone cluster 1, H1e                                                                              | HIST1H1E        | 6p22.2         | -1.74        | 3.04E-9         |
| A_33_P3245922         | NM_006724        | mitogen-activated protein kinase kinase kinase 4, transcript variant 2                              | MAP3K4          | 6q26           | -1.74        | 3.01E-9         |

|                |                 |                                                                              |          |         |       |          |
|----------------|-----------------|------------------------------------------------------------------------------|----------|---------|-------|----------|
| A_19_P00329800 |                 | lincRNA:chr1:204525202-204541352_F                                           |          | 1q32.1  | -1.72 | 4.71E-8  |
| A_33_P3299781  | ENST00000380201 | DDRKG domain containing 1 [Source:HGNC Symbol;Acc:16110]                     | DDRKG1   | 20p13   | -1.72 | 6.66E-8  |
| A_23_P218784   | NM_006386       | DEAD (Asp-Glu-Ala-Asp) box polypeptide 17, transcript variant 1              | DDX17    | 22q13.1 | -1.71 | 3.18E-9  |
| A_23_P214821   | NM_001955       | endothelin 1, transcript variant 1                                           | EDN1     | 6p24.1  | -1.65 | 1.27E-7  |
| A_23_P97021    | NM_024852       | eukaryotic translation initiation factor 2C, 3, transcript variant 1         | EIF2C3   | 1p34.3  | -1.65 | 9.15E-11 |
| A_33_P3254695  | ENST00000363217 | small nucleolar RNA, H/ACA box 73B                                           | SNORA73B | 1p35.3  | -1.64 | 1.14E-9  |
| A_33_P3302652  | ENST00000415882 | chromosome 1 open reading frame 132                                          | C1orf132 | 1q32.1  | -1.62 | 1.13E-9  |
| A_19_P00802156 |                 | lincRNA:chr6:86386083-86388435_R                                             |          | 6q14.1  | -1.60 | 1.01E-6  |
| A_33_P3299865  | NM_003541       | histone cluster 1, H4k                                                       | HIST1H4K | 6p22.1  | -1.60 | 9.55E-9  |
| A_33_P3399028  | NM_006852       | tousled-like kinase 2, transcript variant A                                  | TLK2     | 17q23.2 | -1.60 | 1.25E-8  |
| A_23_P70480    | NM_003546       | histone cluster 1, H4l                                                       | HIST1H4L | 6p22.1  | -1.59 | 6.72E-8  |
| A_32_P106732   | NM_020937       | Fanconi anemia, complementation group M                                      | FANCM    | 14q21.2 | -1.57 | 1.01E-10 |
| A_33_P3218760  | NM_080599       | UPF2 regulator of nonsense transcripts homolog (yeast), transcript variant 1 | UPF2     | 10p14   | -1.57 | 4.56E-9  |

This list contains 39 genes differentially underexpressed in MDE at baseline and at 8-weeks versus control. Changes were assessed by a SAM

analysis set with a FDR of 5% and then challenged with a t-test ( $FC \geq 1.50$ ;  $p < 0.001$ ). Genes in bold are also significant with a FDR set at 1%.

**Supplementary Table ST11: Overexpressed transcripts in control subjects at week 0 compared to week 8**

| Probe          | Accession       | Gene description                                                                                                                 | Gene symbol  | Cytoband | Fold change | P-value |
|----------------|-----------------|----------------------------------------------------------------------------------------------------------------------------------|--------------|----------|-------------|---------|
| A_19_P00317592 |                 | lincRNA:chr5:18664830-18665773_F                                                                                                 |              | 5p15.1   | 3.31        | 3.62E-3 |
| A_33_P3369371  | NM_002084       | glutathione peroxidase 3 (plasma)                                                                                                | GPX3         | 5q32     | 2.55        | 9.40E-3 |
| A_19_P00323342 |                 | lincRNA:chr2:76808692-76823142_R                                                                                                 |              | 2q11.2   | 2.52        | 4.88E-3 |
| A_33_P3816042  | NR_027714       | ARP3 actin-related protein 3 homolog B (yeast) pseudogene 2                                                                      | ACTR3BP2     | 2p11.1   | 2.41        | 1.00E-2 |
| A_33_P3221234  | NM_001145349    | intracisternal A particle-promoted polypeptide, transcript variant 2                                                             | IPP          | 1p34.1   | 2.31        | 2.61E-3 |
| A_19_P00322552 |                 | lincRNA:chr12:112757053-112819896_F                                                                                              |              | 12q24.11 | 2.24        | 8.29E-4 |
| A_19_P00328893 |                 | lincRNA:chr15:41577883-41589833_R                                                                                                |              | 15q14    | 2.05        | 2.02E-3 |
| A_24_P282547   | NM_006684       | complement factor H-related 4                                                                                                    | CFHR4        | 1q31.3   | 2.05        | 4.01E-3 |
| A_33_P3246593  | NM_001010906    | chromosome 8 open reading frame 80                                                                                               | C8orf80      | 8p21.1   | 1.94        | 3.34E-3 |
| A_19_P00324529 |                 | lincRNA:chr1:98439262-98699162_R                                                                                                 |              | 1p21.3   | 1.87        | 2.57E-3 |
| A_33_P3371115  | NR_026558       | aquaporin 7 pseudogene 3                                                                                                         | AQP7P3       | 9p12     | 1.87        | 9.38E-3 |
| A_19_P00324163 |                 | lincRNA:chr6:40304947-40323847_F                                                                                                 |              | 6q14.1   | 1.85        | 6.60E-3 |
| A_19_P00801344 | ENST00000400306 |                                                                                                                                  |              | 4q28.3   | 1.82        | 4.13E-4 |
| A_23_P121545   | NM_201591       | glycoprotein M6A, transcript variant 2                                                                                           | GPM6A        | 4q34.1   | 1.77        | 2.40E-3 |
| A_23_P218002   | NM_002728       | proteoglycan 2, bone marrow (natural killer cell activator, eosinophil granule major basic protein)                              | PRG2         | 11q12.1  | 1.75        | 8.39E-3 |
| A_33_P3356371  | AK127766        | cDNA FLJ45867 fis, clone OCBBF3003745                                                                                            | LOC100133089 | 10q21.1  | 1.74        | 6.80E-3 |
| A_23_P135257   | NM_002771       | protease serine 3, transcript variant 2                                                                                          | PRSS3        | 9p13.3   | 1.73        | 6.58E-3 |
| A_23_P129014   | NM_145231       | chromosome 14 open reading frame 143                                                                                             | C14orf143    | 14q32.11 | 1.72        | 3.96E-3 |
| A_23_P431853   | ENST00000361453 | mitochondrially encoded NADH dehydrogenase 2 [Source:HGNC Symbol;Acc:7456]                                                       | MT-ND2       | MT       | 1.70        | 5.71E-3 |
| A_33_P3369520  | A_33_P3369520   | membrane-associated guanylate kinase, WW and PDZ domain containing 3, transcript variant 2                                       | MAGI3        | 1p13.2   | 1.67        | 9.52E-3 |
| A_19_P00316590 |                 | lincRNA:chr15:38364787-38365169_F                                                                                                |              | 15q14    | 1.67        | 6.47E-3 |
| A_33_P3356985  | AB529250        | Synthetic construct DNA clone: pF1KE0817 Homo sapiens OLFR827 gene for olfactory receptor 827 without stop codon in Flexi system | AB529250     | 12q13.13 | 1.67        | 6.71E-3 |
| A_23_P71649    | NM_005592       | muscle skeletal receptor tyrosine kinase, transcript variant 1                                                                   | MUSK         | 9q31.3   | 1.65        | 2.30E-4 |
| A_33_P3335735  | NR_024559       | hypothetical LOC100128977                                                                                                        | LOC100128977 | 17q21.31 | 1.65        | 3.06E-3 |
| A_23_P110288   | NM_024751       | glutathione S-transferase C-terminal domain containing, transcript variant 2                                                     | GSTCD        | 4p24     | 1.65        | 3.77E-3 |

|                |                 |                                                                          |                 |          |      |         |
|----------------|-----------------|--------------------------------------------------------------------------|-----------------|----------|------|---------|
| A_23_P10291    | NM_001910       | cathepsin E, transcript variant 1                                        | CTSE            | 1q32.1   | 1.62 | 4.12E-3 |
| A_19_P00322966 |                 | lincRNA:chrX:62648777-62780763_R                                         |                 | Xp11.1   | 1.62 | 9.23E-3 |
| A_33_P3268734  | CR748640        | CR748640 Soares_NFL_T_GBC_S1 cDNA clone IMAGp971L0898 ; IMAGE:2348699 5' | CR748640        | 9q34.13  | 1.58 | 3.28E-3 |
| A_23_P420196   | NM_003745       | suppressor of signaling 1                                                | SOCS1           | 16p13.12 | 1.57 | 7.92E-3 |
| A_33_P3219517  | NM_000905       | neuropeptide Y                                                           | NPY             | 7p15.3   | 1.57 | 4.30E-3 |
| A_24_P119545   | ENST00000366784 |                                                                          | ENST00000366784 | 1q42.12  | 1.55 | 2.39E-3 |
| A_23_P379020   | NR_002328       | gonadotropin-releasing hormone (type 2) receptor 2                       | GNRHR2          | 1q21.1   | 1.54 | 2.60E-3 |
| A_33_P3742500  | BC132887        | hypothetical protein LOC642947                                           | LOC642947       | 9q21.2   | 1.53 | 5.44E-3 |
| A_19_P00320819 |                 | lincRNA:chr7:22895704-22896694_F                                         |                 | 7p15.3   | 1.53 | 2.63E-3 |
| A_19_P00811707 |                 | lincRNA:chr8:8480290-8488065_F                                           |                 | 8p23.1   | 1.51 | 1.92E-3 |

This list contains 35 genes differentially overexpressed in control subjects at baseline versus 8-weeks. Changes were assessed by a t-test (FC  $\geq$  1.50;  $p < 0.001$ ).

**Supplementary Table ST12: Underexpressed transcripts in control subjects at week 0 compared to week 8**

| Probe          | Accession    | Gene description                                                                      | Gene symbol  | Cytoband | Fold change | P-value |
|----------------|--------------|---------------------------------------------------------------------------------------|--------------|----------|-------------|---------|
| A_23_P34637    | NM_000537    | renin                                                                                 | REN          | 1q32.1   | -2.30       | 8.98E-3 |
| A_23_P90925    | NM_173178    | interleukin 36 beta, transcript variant 2                                             | IL36B        | 2q13     | -2.17       | 3.60E-3 |
| A_33_P3353979  | NM_181519    | synaptotagmin XV, transcript variant b                                                | SYT15        | 10q11.22 | -2.09       | 9.56E-3 |
| A_24_P250922   | NM_000963    | prostaglandin-endoperoxide synthase 2 (prostaglandin G/H synthase and cyclooxygenase) | PTGS2        | 1q31.1   | -2.02       | 1.33E-3 |
| A_33_P3240637  | AK124325     | cDNA FLJ42334 fis, clone TUTER20009                                                   | AK124325     | 4q32.3   | -1.93       | 2.62E-3 |
| A_23_P151870   | NM_015554    | glucuronic acid epimerase                                                             | GLCE         | 15q23    | -1.92       | 7.76E-3 |
| A_33_P3382236  | NM_018330    | KIAA1598                                                                              | KIAA1598     | 10q25.3  | -1.90       | 3.66E-3 |
| A_23_P116624   | NM_004211    | solute carrier family 6 (neurotransmitter transporter glycine) member 5               | SLC6A5       | 11p15.1  | -1.87       | 4.71E-3 |
| A_24_P51909    | NM_006651    | complexin 1                                                                           | CPLX1        | 4p16.3   | -1.81       | 2.65E-4 |
| A_23_P155301   | NM_145910    | NIMA (never in mitosis gene A)-related kinase 11, transcript variant 2                | NEK11        | 3q22.1   | -1.74       | 4.14E-3 |
| A_33_P3251480  | NM_021970    | MAPK scaffold protein 1, transcript variant 1                                         | MAPKSP1      | 4q23     | -1.69       | 1.12E-3 |
| A_33_P3232945  | NM_005242    | coagulation factor II (thrombin) receptor-like 1                                      | F2RL1        | 5q13.3   | -1.67       | 2.43E-3 |
| A_33_P3281283  | NM_005226    | sphingosine-1-phosphate receptor 3                                                    | S1PR3        | 9q22.1   | -1.66       | 4.20E-3 |
| A_33_P3281191  | NM_002508    | nidogen 1                                                                             | NID1         | 1q42.2   | -1.65       | 4.16E-3 |
| A_23_P16063    | NM_002088    | glutamate receptor, ionotropic, kainate 5                                             | GRIK5        | 19q13.2  | -1.59       | 6.44E-3 |
| A_33_P3394978  | NR_027276    | hypothetical LOC100128239                                                             | LOC100128239 | 11q25    | -1.56       | 6.63E-3 |
| A_19_P00315746 |              | lincRNA:chr5:92747114-92758113_R                                                      |              | 5q14.3   | -1.55       | 1.24E-3 |
| A_23_P148568   | NM_017809    | nuclear RNA export factor 2, transcript variant 1                                     | NXF2         | Xq22.1   | -1.54       | 2.96E-3 |
| A_33_P3363560  | NM_001136216 | transmembrane protein 51, transcript variant 1                                        | TMEM51       | 1p36.21  | -1.54       | 6.09E-3 |
| A_23_P67453    | NM_000363    | troponin I type 3 (cardiac)                                                           | TNNI3        | 19q13.42 | -1.52       | 9.55E-4 |

This list contains 20 genes differentially underexpressed in control subjects at baseline versus at 8-weeks. Changes were assessed by a t-test (FC  $\geq 1.50$ ;  $p < 0.001$ ).



**Supplementary Table ST13: Gene ontology analysis of dysregulated genes in MDE 0 and 8-weeks (responders) vs controls (FDR ≤ 5%)**

| Category           | ID         | Term                                 | Genes                                                                           | Count | %    | P-value |
|--------------------|------------|--------------------------------------|---------------------------------------------------------------------------------|-------|------|---------|
| <b>FC ≥ 1.50</b>   |            |                                      |                                                                                 |       |      |         |
| Biological process | GO:0007040 | Lysosome organization                | <i>HEXB, PPT1, TPP1</i>                                                         | 3     | 9.7  | 7.4E-4  |
| Cellular component | GO:0016023 | Cytoplasmic membrane-bounded vesicle | <i>DENND1A, HEXB, MAPKAP1, PPT1, PDCC6IP, TPP1</i>                              | 6     | 19.4 | 1.7E-3  |
| Biological process | GO:0007033 | Vacuole organization                 | <i>HEXB, PPT1, TPP1</i>                                                         | 3     | 9.7  | 1.9E-3  |
| <b>FC ≤ -1.50</b>  |            |                                      |                                                                                 |       |      |         |
| Cellular component | GO:0000786 | Nucleosome                           | <i>HIST1H1D, HIST1H1E, HIST1H3D, HIST1H4A/HIST1H4L/HIST1H4E/HIST1H4K</i>        | 4     | 14.8 | 5.0E-5  |
| Cellular component | GO:0044427 | Chromosomal part                     | <i>CENPP, HIST1H1D, HIST1H1E, HIST1H3D, HIST1H4A/HIST1H4L/HIST1H4E/HIST1H4K</i> | 5     | 18.5 | 8.6E-4  |
| Biological process | GO:0006325 | Chromatin organization               | <i>HIST1H1D, HIST1H1E, HIST1H3D, HIST1H4A/HIST1H4L/HIST1H4E/HIST1H4K, TLK2</i>  | 5     | 18.5 | 1.1E-3  |

Bold entries refer to candidate transcripts tested for RT-qPCR validation.

**Supplementary Table ST14: Analysis of chromosomal cytoband enrichment among dysregulated genes**

| Cytoband                             | Genes                                                                                                     | Count     | Total number in cytoband | P-value        | FDR               |
|--------------------------------------|-----------------------------------------------------------------------------------------------------------|-----------|--------------------------|----------------|-------------------|
| MDE <sub>0w</sub> vs C, (FC ≥ 1.50)  |                                                                                                           |           |                          |                |                   |
| <b>2q21</b>                          | <b>CCNT2, POTE, POTEF, POTEKP, R3HDM1</b>                                                                 | <b>5</b>  | <b>83</b>                | <b>1.3E-5</b>  | <b>0.0010</b>     |
| 12q23                                | APAF1, ELK3, CHPT1                                                                                        | 3         | 103                      | 6.2E-3         | 0.24              |
| 4p14                                 | KLHL5, RBM47                                                                                              | 2         | 44                       | 1.1E-2         | 0.29              |
| 4p16                                 | CTBP1, MAN2B2, PCGF3                                                                                      | 3         | 158                      | 2.0E-2         | 0.38              |
| 3p24                                 | TBC1D5, UBE2E2                                                                                            | 2         | 74                       | 2.9E-2         | 0.45              |
| MDE <sub>0w</sub> vs C, (FC ≤ -1.50) |                                                                                                           |           |                          |                |                   |
| <b>6p22</b>                          | <b>HIST1H1A, HIST1H1D, HIST1H1E, HIST1H3D, HIST1H3F, HIST1H4A, HIST1H4E, HIST1H4K, HIST1H4L</b>           | <b>9</b>  | <b>288</b>               | <b>8.6E-9</b>  | <b>&lt;0.0001</b> |
| 6p12                                 | CLIC5, RN7SK                                                                                              | 2         | 102                      | 1.9E-2         | 0.28              |
| 16p13                                | CASKIN1, PKD1, SNX29                                                                                      | 3         | 328                      | 3.1E-2         | 0.30              |
| MDE <sub>8w</sub> vs C, (FC ≥ 1.50)  |                                                                                                           |           |                          |                |                   |
| <b>22q13</b>                         | <b>ATXN10, LOC391334, NAGA, PLXNB2, TRIOBP</b>                                                            | <b>5</b>  | <b>256</b>               | <b>1.1E-4</b>  | <b>0.0041</b>     |
| <b>2q21</b>                          | <b>POTE, POTEKP, UBXN4</b>                                                                                | <b>3</b>  | <b>83</b>                | <b>4.9E-4</b>  | <b>0.0093</b>     |
| <b>9p21</b>                          | <b>ISCA1, ALDH1A1, GNAQ</b>                                                                               | <b>3</b>  | <b>99</b>                | <b>8.1E-4</b>  | <b>0.010</b>      |
| 15q24                                | ADPGK, NPTN                                                                                               | 2         | 98                       | 1.4E-2         | 0.091             |
| 5q13                                 | HEXB, ZNF366                                                                                              | 2         | 99                       | 1.4E-2         | 0.091             |
| 12q23                                | LTA4H, CHPT1                                                                                              | 2         | 103                      | 1.6E-2         | 0.091             |
| 9q33                                 | DENND1A, MAPKAP1                                                                                          | 2         | 107                      | 1.7E-2         | 0.091             |
| 10q11                                | CSGALNACT2, HNRNPF                                                                                        | 2         | 153                      | 3.2E-2         | 0.15              |
| MDE <sub>8w</sub> vs C, (FC ≤ -1.50) |                                                                                                           |           |                          |                |                   |
| <b>6p22</b>                          | <b>HIST1H1A, HIST1H1C, HIST1H1D, HIST1H1E, HIST1H3D, HIST1H3F, HIST1H4A, HIST1H4E, HIST1H4K, HIST1H4L</b> | <b>10</b> | <b>288</b>               | <b>9.0E-11</b> | <b>&lt;0.0001</b> |
| 6p12                                 | CLIC5, RN7SK                                                                                              | 2         | 102                      | 1.5E-2         | 0.16              |
| 7p15                                 | HOXA3, HOXA7                                                                                              | 2         | 112                      | 1.8E-2         | 0.16              |

Bold entries refer to significantly enriched cytobands after considering a FDR set at 1%.

**Supplementary Table ST15: Mean Ct of miRNAs and other non-coding RNA expressed in PBMCs of both MDE and control samples**

| Small RNA          | Mean Ct      | S.D.        |
|--------------------|--------------|-------------|
| hsa-miR-517b       | 15.97        | 1.37        |
| hsa-miR-223        | 18.01        | 0.91        |
| <b>hsa-miR-150</b> | <b>19.06</b> | <b>0.53</b> |
| hsa-miR-1305       | 19.09        | 0.51        |
| <b>U6 snRNA</b>    | <b>19.35</b> | <b>0.44</b> |
| hsa-miR-519b-3p    | 19.37        | 0.72        |
| MammU6             | 19.45        | 0.60        |
| hsa-miR-1267       | 19.52        | 0.98        |
| hsa-miR-338-5P     | 19.53        | 0.90        |
| hsa-miR-142-3p     | 20.65        | 1.44        |
| <b>RNU48</b>       | <b>20.80</b> | <b>0.46</b> |
| <b>RNU48</b>       | <b>20.83</b> | <b>0.53</b> |
| hsa-miR-100-3p     | 20.84        | 1.68        |
| hsa-miR-126        | 21.09        | 1.10        |
| hsa-miR-16         | 21.21        | 1.00        |
| hsa-miR-376a-5p    | 21.29        | 2.11        |
| hsa-miR-106a       | 21.37        | 0.89        |
| hsa-miR-19b        | 21.47        | 1.22        |
| hsa-miR-17         | 21.53        | 0.91        |
| hsa-miR-24         | 21.55        | 0.86        |
| hsa-miR-146a       | 21.91        | 0.94        |
| hsa-miR-342-3p     | 21.98        | 0.71        |
| hsa-miR-484        | 22.35        | 0.63        |
| <b>hsa-miR-222</b> | <b>22.46</b> | <b>0.67</b> |
| hsa-miR-26a        | 22.56        | 1.02        |
| hsa-miR-146b-5p    | 22.63        | 1.13        |
| <b>RNU44</b>       | <b>23.12</b> | <b>0.66</b> |
| hsa-miR-720        | 23.17        | 0.42        |
| hsa-miR-191        | 23.17        | 0.76        |
| <b>hsa-miR-30c</b> | <b>23.26</b> | <b>0.77</b> |
| hsa-miR-1274b      | 23.32        | 0.51        |
| hsa-miR-20a        | 23.38        | 1.12        |
| hsa-miR-26b        | 23.42        | 1.19        |
| hsa-miR-29a        | 23.79        | 1.15        |
| hsa-miR-21         | 23.88        | 1.40        |
| hsa-miR-19a        | 23.89        | 1.35        |
| hsa-miR-30b        | 23.91        | 0.92        |
| RNU44              | 23.94        | 0.81        |
| <b>hsa-miR-186</b> | <b>24.04</b> | <b>0.75</b> |
| hsa-miR-29c        | 24.22        | 0.80        |
| hsa-miR-374b       | 24.37        | 1.06        |
| hsa-let-7g         | 24.52        | 1.28        |

|                       |              |             |
|-----------------------|--------------|-------------|
| hsa-miR-126-5p        | 24.64        | 1.48        |
| hsa-miR-93            | 24.95        | 2.93        |
| hsa-miR-140-5p        | 25.02        | 1.10        |
| hsa-miR-15b           | 25.18        | 0.99        |
| hsa-miR-92a           | 25.24        | 0.69        |
| hsa-miR-221           | 25.56        | 0.99        |
| hsa-miR-31            | 25.65        | 1.10        |
| hsa-miR-106b          | 25.68        | 1.29        |
| hsa-miR-374a          | 25.73        | 1.34        |
| hsa-miR-let-7e        | 25.75        | 1.13        |
| hsa-miR-331-3p        | 25.81        | 0.67        |
| hsa-miR-766           | 25.87        | 0.80        |
| hsa-miR-320           | 25.93        | 0.97        |
| <b>hsa-miR-30a-5p</b> | <b>26.02</b> | <b>0.82</b> |
| hsa-miR-155           | 26.06        | 0.68        |
| hsa-miR-486-5p        | 26.08        | 0.76        |
| hsa-miR-1243          | 26.13        | 0.94        |
| hsa-miR-454           | 26.16        | 1.04        |
| hsa-miR-618           | 26.17        | 2.05        |
| hsa-miR-199a-3p       | 26.17        | 1.43        |
| hsa-miR-590-5p        | 26.23        | 1.24        |
| hsa-miR-425           | 26.24        | 0.84        |
| hsa-miR-151-3p        | 26.28        | 1.09        |
| hsa-miR-20b-3p        | 26.29        | 2.30        |
| hsa-miR-145           | 26.32        | 1.22        |
| <b>hsa-miR-28-3p</b>  | <b>26.32</b> | <b>0.60</b> |
| hsa-miR-1233          | 26.34        | 0.62        |
| hsa-miR-1260          | 26.37        | 0.33        |
| hsa-miR-27a           | 26.50        | 1.30        |
| hsa-miR-103           | 26.53        | 0.99        |
| hsa-miR-345           | 26.57        | 0.75        |
| hsa-miR-574-3p        | 26.59        | 0.51        |
| <b>hsa-miR-30d</b>    | <b>26.83</b> | <b>0.85</b> |
| hsa-miR-140-3p        | 26.89        | 0.78        |
| hsa-miR-328           | 26.95        | 0.62        |
| hsa-miR-93-3p         | 26.97        | 0.57        |
| hsa-miR-195           | 26.98        | 1.11        |
| hsa-miR-1225-3p       | 27.08        | 1.16        |
| hsa-miR-532-5p        | 27.25        | 0.91        |
| hsa-miR-340           | 27.30        | 1.44        |
| <b>hsa-miR-1274a</b>  | <b>27.35</b> | <b>0.43</b> |
| hsa-miR-744           | 27.49        | 0.87        |
| hsa-miR-652           | 27.55        | 1.18        |
| hsa-miR-660           | 27.60        | 1.35        |
| hsa-miR-20b           | 27.70        | 1.04        |
| hsa-miR-512-3p        | 27.72        | 1.57        |
| hsa-miR-625-3p        | 27.74        | 0.87        |

|                       |              |             |
|-----------------------|--------------|-------------|
| hsa-miR-30e-3p        | 27.85        | 1.04        |
| hsa-miR-339-5p        | 27.87        | 0.90        |
| hsa-miR-142-5p        | 27.87        | 1.47        |
| hsa-miR-596           | 27.88        | 0.79        |
| <b>hsa-miR-25</b>     | <b>27.88</b> | <b>0.90</b> |
| hsa-miR-409-3p        | 27.91        | 2.00        |
| hsa-miR-139-5p        | 27.92        | 1.06        |
| hsa-let-7d            | 27.96        | 1.19        |
| hsa-miR-181a          | 27.98        | 1.01        |
| hsa-miR-197           | 27.99        | 0.49        |
| hsa-miR-376c          | 28.00        | 1.89        |
| hsa-miR-642           | 28.07        | 1.22        |
| hsa-miR-130a          | 28.07        | 1.25        |
| hsa-miR-28-5p         | 28.08        | 1.16        |
| hsa-miR-451           | 28.12        | 1.84        |
| rno-miR-7a-1*         | 28.22        | 1.31        |
| hsa-miR-301a          | 28.23        | 1.25        |
| hsa-miR-339-3p        | 28.24        | 0.88        |
| <b>hsa-miR-132</b>    | <b>28.25</b> | <b>0.64</b> |
| <b>hsa-miR-664</b>    | <b>28.38</b> | <b>0.82</b> |
| hsa-let-7a            | 28.42        | 1.42        |
| hsa-miR-let-7b        | 28.56        | 1.51        |
| hsa-miR-532-3p        | 28.60        | 0.64        |
| hsa-miR-939           | 28.65        | 0.76        |
| hsa-miR-422a          | 28.79        | 0.89        |
| hsa-miR-335           | 28.92        | 1.31        |
| hsa-miR-185           | 28.99        | 1.24        |
| hsa-miR-151-5p        | 29.00        | 1.20        |
| hsa-miR-340-3p        | 29.02        | 1.19        |
| hsa-miR-148a          | 29.15        | 1.32        |
| hsa-miR-149-3p        | 29.16        | 0.95        |
| hsa-miR-101           | 29.16        | 1.56        |
| hsa-miR-342-5p        | 29.16        | 1.24        |
| hsa-miR-125a-5p       | 29.29        | 0.94        |
| hsa-miR-152           | 29.30        | 1.08        |
| hsa-miR-494           | 29.30        | 1.42        |
| hsa-miR-223-5p        | 29.33        | 1.26        |
| hsa-miR-192           | 29.35        | 1.22        |
| hsa-miR-27b           | 29.36        | 1.36        |
| hsa-miR-23a           | 29.40        | 1.06        |
| hsa-miR-491-5p        | 29.42        | 0.98        |
| hsa-miR-378           | 29.47        | 1.08        |
| hsa-miR-193b          | 29.48        | 0.96        |
| hsa-miR-22            | 29.50        | 2.15        |
| <b>hsa-miR-27a-5p</b> | <b>29.54</b> | <b>0.84</b> |
| hsa-miR-106b-3p       | 29.58        | 1.12        |
| hsa-miR-15a           | 29.58        | 1.40        |

|                                       |                              |                             |
|---------------------------------------|------------------------------|-----------------------------|
| hsa-miR-200c                          | 29.61                        | 0.83                        |
| <a href="#">hsa-miR-425-3p</a>        | <a href="#">29.64</a>        | <a href="#">0.95</a>        |
| hsa-miR-99b                           | 29.66                        | 0.99                        |
| hsa-miR-127-3p                        | 29.72                        | 1.44                        |
| <b><a href="#">hsa-miR-769-5p</a></b> | <b><a href="#">29.75</a></b> | <b><a href="#">0.88</a></b> |
| hsa-miR-148b                          | 29.81                        | 1.10                        |
| hsa-miR-362-5p                        | 29.81                        | 0.87                        |
| hsa-miR-323-3p                        | 29.86                        | 1.03                        |
| <a href="#">hsa-miR-144-5p</a>        | <a href="#">29.97</a>        | <a href="#">2.12</a>        |
| <a href="#">hsa-miR-1227</a>          | <a href="#">29.98</a>        | <a href="#">0.92</a>        |
| hsa-let-7f                            | 29.98                        | 1.26                        |
| <a href="#">hsa-miR-1275</a>          | <a href="#">30.02</a>        | <a href="#">1.52</a>        |
| hsa-miR-29b                           | 30.06                        | 2.43                        |
| hsa-miR-143                           | 30.09                        | 2.04                        |
| <b><a href="#">hsa-miR-324-3p</a></b> | <b><a href="#">30.11</a></b> | <b><a href="#">0.69</a></b> |
| hsa-miR-486-3p                        | 30.15                        | 0.93                        |
| hsa-miR-486-3p                        | 30.15                        | 0.93                        |
| hsa-miR-130b                          | 30.22                        | 1.26                        |
| hsa-miR-95                            | 30.24                        | 0.95                        |
| <a href="#">hsa-miR-15b-3p</a>        | <a href="#">30.27</a>        | <a href="#">2.69</a>        |
| hsa-miR-628-5p                        | 30.31                        | 0.91                        |
| <a href="#">hsa-miR-181a-2-3p</a>     | <a href="#">30.32</a>        | <a href="#">2.04</a>        |
| <b><a href="#">hsa-miR-671-3p</a></b> | <b><a href="#">30.32</a></b> | <b><a href="#">0.69</a></b> |
| hsa-miR-324-5p                        | 30.38                        | 1.1                         |
| <a href="#">hsa-miR-590-3p</a>        | <a href="#">30.40</a>        | <a href="#">2.36</a>        |
| hsa-miR-210                           | 30.42                        | 1.12                        |
| hsa-miR-495                           | 30.42                        | 2.07                        |
| <a href="#">hsa-miR-302c-5p</a>       | <a href="#">30.47</a>        | <a href="#">1.32</a>        |
| hsa-miR-501-5p                        | 30.62                        | 1.3                         |
| hsa-miR-539                           | 30.69                        | 2.44                        |
| <a href="#">hsa-miR-22-5p</a>         | <a href="#">30.84</a>        | <a href="#">1.95</a>        |
| hsa-miR-34a                           | 30.84                        | 2.33                        |
| <b><a href="#">hsa-miR-1201</a></b>   | <b><a href="#">30.84</a></b> | <b><a href="#">0.63</a></b> |
| hsa-miR-9                             | 30.86                        | 1.69                        |
| hsa-miR-382                           | 30.87                        | 2.9                         |
| hsa-miR-370                           | 30.89                        | 3.08                        |
| hsa-miR-224                           | 30.96                        | 2.03                        |
| <a href="#">hsa-miR-605</a>           | <a href="#">30.99</a>        | <a href="#">1.19</a>        |
| <a href="#">hsa-miR-20a-3p</a>        | <a href="#">31.00</a>        | <a href="#">1.28</a>        |
| hsa-miR-346                           | 31.05                        | 0.81                        |
| hsa-miR-500                           | 31.06                        | 1.17                        |
| <b><a href="#">hsa-miR-638</a></b>    | <b><a href="#">31.07</a></b> | <b><a href="#">0.71</a></b> |
| <a href="#">hsa-miR-31-3p</a>         | <a href="#">31.08</a>        | <a href="#">1.72</a>        |
| hsa-miR-296-5p                        | 31.08                        | 0.86                        |
| hsa-miR-194                           | 31.10                        | 1.84                        |
| hsa-miR-376a                          | 31.14                        | 1.75                        |
| hsa-miR-431                           | 31.14                        | 3.29                        |

|                       |              |             |
|-----------------------|--------------|-------------|
| <b>hsa-miR-1208</b>   | <b>31.14</b> | <b>0.62</b> |
| hsa-miR-24-2-5p       | 31.19        | 1.41        |
| hsa-miR-18a           | 31.19        | 1.79        |
| hsa-miR-320b          | 31.20        | 1.43        |
| hsa-miR-133a          | 31.21        | 1.71        |
| hsa-miR-571           | 31.22        | 0.91        |
| hsa-miR-98            | 31.24        | 1.02        |
| hsa-miR-485-3p        | 31.28        | 1.48        |
| hsa-miR-625           | 31.31        | 1.47        |
| hsa-miR-26b-3p        | 31.32        | 0.72        |
| hsa-miR-487a          | 31.33        | 1.30        |
| hsa-miR-411           | 31.35        | 2.58        |
| hsa-miR-361-5p        | 31.36        | 1.85        |
| hsa-miR-1290          | 31.37        | 0.95        |
| hsa-miR-331-5p        | 31.37        | 1.93        |
| hsa-miR-301b          | 31.40        | 1.42        |
| hsa-miR-487b          | 31.42        | 2.20        |
| hsa-miR-128           | 31.43        | 1.21        |
| hsa-miR-335-3p        | 31.46        | 1.10        |
| hsa-miR-100           | 31.53        | 1.46        |
| <b>hsa-miR-212</b>    | <b>31.54</b> | <b>0.69</b> |
| hsa-miR-213           | 31.55        | 1.20        |
| hsa-miR-138           | 31.56        | 1.12        |
| hsa-miR-219-5p        | 31.56        | 2.15        |
| hsa-miR-598           | 31.57        | 1.45        |
| hsa-miR-30a-3p        | 31.61        | 1.80        |
| hsa-miR-200b          | 31.64        | 1.76        |
| hsa-miR-99a           | 31.66        | 2.40        |
| hsa-miR-107           | 31.67        | 2.13        |
| hsa-miR-381           | 31.71        | 1.27        |
| hsa-miR-10a           | 31.76        | 1.52        |
| hsa-miR-125b          | 31.82        | 1.39        |
| hsa-miR-193a-5p       | 31.92        | 1.07        |
| <b>hsa-miR-34b</b>    | <b>31.92</b> | <b>0.63</b> |
| <b>hsa-miR-330-3p</b> | <b>31.97</b> | <b>0.79</b> |
| hsa-miR-636           | 32.11        | 0.70        |
| hsa-miR-410           | 32.11        | 2.21        |
| hsa-miR-636           | 32.11        | 0.70        |
| hsa-miR-432           | 32.15        | 2.47        |
| hsa-miR-629           | 32.19        | 1.62        |
| hsa-miR-363           | 32.21        | 2.01        |
| hsa-miR-758           | 32.23        | 1.72        |
| hsa-miR-361-3p        | 32.24        | 1.95        |
| hsa-miR-941           | 32.25        | 1.83        |
| hsa-miR-433           | 32.26        | 3.19        |
| hsa-miR-378           | 32.30        | 0.95        |
| hsa-miR-1271          | 32.30        | 1.29        |

|                    |              |             |
|--------------------|--------------|-------------|
| hsa-miR-23b        | 32.31        | 2.08        |
| hsa-miR-1247       | 32.35        | 1.68        |
| hsa-miR-181c       | 32.37        | 1.24        |
| hsa-miR-628-3p     | 32.40        | 1.44        |
| hsa-miR-148b-5p    | 32.43        | 2.06        |
| <b>hsa-miR-659</b> | <b>32.47</b> | <b>0.82</b> |
| hsa-miR-942        | 32.48        | 1.16        |
| hsa-miR-1254       | 32.49        | 2.37        |
| hsa-miR-33a-3p     | 32.54        | 3.00        |
| hsa-miR-26a-1-3p   | 32.57        | 2.13        |
| hsa-miR-545        | 32.58        | 1.80        |
| hsa-miR-579        | 32.6         | 2.44        |
| hsa-miR-32         | 32.68        | 2.24        |
| hsa-miR-1296       | 32.73        | 1.68        |
| hsa-miR-215        | 32.79        | 1.39        |
| hsa-miR-656        | 32.83        | 1.70        |
| hsa-miR-589        | 32.86        | 1.84        |
| hsa-miR-16-1-3p    | 32.92        | 2.14        |
| hsa-miR-365        | 32.97        | 1.95        |
| hsa-miR-19b-1-5p   | 32.98        | 1.86        |
| hsa-miR-191-3p     | 32.99        | 1.78        |

---

MiRNAs assayed from 384 well TaqMan Human miRNA Array plate A are indicated in black, while those from plate B are in blue. Bold entries refer to reference miRNA used for relative quantification calculations.



**Supplementary Table ST16: Dysregulated miRNAs predicted to interact with oppositely dysregulated mRNAs**

| miRNA ↗                      | mRNA ↘                        | Prediction source              | miRNA ↘      | mRNA ↗                                                                                                  | Prediction source |
|------------------------------|-------------------------------|--------------------------------|--------------|---------------------------------------------------------------------------------------------------------|-------------------|
| <b>MDE<sub>0w</sub> vs C</b> |                               |                                |              |                                                                                                         |                   |
| hsa-miR-107                  | EIF2C3                        | miRecords                      | hsa-miR-636  | KLHL5                                                                                                   | TargetScan        |
| hsa-miR-107                  | CDV3, ELMO2, NEK10, UPF2      | TargetScan                     | hsa-miR-1243 | ARL8B                                                                                                   | TargetScan        |
| hsa-miR-133a                 | C11orf9, MAML3                | TargetScan                     | hsa-miR-381  | AGFG1, APAF1, <b>CELF2</b> , DCAF12, KRAS, MYH9, PCGF3, PPFIA1, C12orf23, R3HDM1, RAP2C, UBE2E2, ZFAND3 | TargetScan        |
| hsa-miR-148a                 | MAP3K4                        | TargetScan                     | hsa-miR-200c | ELMO2                                                                                                   | miRecords         |
| hsa-miR-494                  | EIF2C3, EML4, UPF2            | TargetScan                     | hsa-miR-200c | AGFG1, APAF1, <b>CELF2</b> , DENND5A, E2F3, GALNT2, KRAS, MCFD2, PPFIA1, PTBP1, RAB18, RAP2C, SGPP1     | TargetScan        |
| hsa-miR-579                  | CLIC5                         | TargetScan                     |              |                                                                                                         |                   |
| <b>MDE<sub>8w</sub> vs C</b> |                               |                                |              |                                                                                                         |                   |
| hsa-let-7b                   | SMC1A                         | miRecords, TargetScan, TarBase | hsa-miR-571  | KIAA1598                                                                                                | TargetScan        |
| hsa-let-7b                   | CASKIN1, DLGAP4, EDN1, EIF2C3 | TargetScan                     | hsa-miR-454  | ACSL4                                                                                                   | TargetScan        |
| hsa-miR-363                  | BCL11A, CASKIN1, EIF2C3       | TargetScan                     |              |                                                                                                         |                   |
| hsa-miR-331-3p               | VANGL1                        | TargetScan                     |              |                                                                                                         |                   |

**Supplementary Table ST17: Candidate genes tested by RT-qPCR**

| Reference gene        | Detector                       | Ct mean |
|-----------------------|--------------------------------|---------|
|                       | <i>GAPDH</i> -Hs99999905_m1    | 19.80   |
| <i>GAPDH/PAFAH1B1</i> | <i>HIST1H1E</i> -Hs00271195_s1 | 21.04   |
| <i>GAPDH/PAFAH1B1</i> | <i>PPT1</i> -Hs00165579_m1     | 22.65   |
| <i>GAPDH/PAFAH1B1</i> | <i>TPP1</i> -Hs00166099_m1     | 23.54   |
|                       | <i>PAFAH1B1</i> -Hs00181182_m1 | 24.03   |
| <i>PAFAH1B1/ALDOC</i> | <i>IRF2</i> -Hs01082884_m1     | 24.08   |
| <i>PAFAH1B1/ALDOC</i> | <i>HIST1H1A</i> -Hs00271225_s1 | 24.74   |
| <i>PAFAH1B1/ALDOC</i> | <i>HIST1H4E</i> -Hs00374346_s1 | 25.00   |
| <i>PAFAH1B1/ALDOC</i> | <i>POTEKP</i> -Hs02598440_g1   | 25.08   |
| <i>PAFAH1B1/ALDOC</i> | <i>CELF2</i> -Hs00990166_m1    | 25.43   |
| <i>PAFAH1B1/ALDOC</i> | <i>SORT1</i> -Hs00361760_m1    | 26.07   |
| <i>PAFAH1B1/ALDOC</i> | <i>ACTBL2</i> -Hs01101944_s1   | 26.11   |
| <i>PAFAH1B1/ALDOC</i> | <i>TNF</i> -Hs00174128_m1      | 26.41   |
|                       | <i>ALDOC</i> -Hs00193059_m1    | 27.15   |
| <i>ALDOC/SV2A</i>     | <i>IL1B</i> -Hs00174097_m1     | 27.38   |
| <i>ALDOC/SV2A</i>     | <i>NRG1</i> -Hs00247624_m1     | 29.62   |
| <i>ALDOC/SV2A</i>     | <i>SLC6A4</i> -Hs00169010_m1   | 29.70   |
|                       | <i>SV2A</i> -Hs00372069_m1     | 30.10   |
| <i>SV2A</i>           | <i>ATP2A2</i> -Hs00155939_m1   | 32.64   |

**Supplementary Table ST18: A comparison of mixed linear model for candidate mRNA expression between responders and nonresponders, adjusted with co-variables and tested in combination with age and sex**

| Gene            | Age & sex only | Smocking       | Treat          | Mono          | Mirt         | SNRI         | SSRI           | Other antidep  | Lithium        | AAP           | ECT            | Rec MDE        | Age of onset  | Episode duration | Suicide        |
|-----------------|----------------|----------------|----------------|---------------|--------------|--------------|----------------|----------------|----------------|---------------|----------------|----------------|---------------|------------------|----------------|
| <i>ACTBL2</i>   | <b>0.025</b>   | <b>0.028</b>   | <b>0.026</b>   | <b>0.004</b>  | <b>0.011</b> | <b>0.011</b> | 0.063          | <b>0.026</b>   | <b>0.040</b>   | 0.082         | <b>0.027</b>   | <b>0.029</b>   | 0.055         | <b>0.004</b>     | <b>0.032</b>   |
| <i>ATP2A2</i>   | 0.904          | 0.880          | 0.919          | 0.905         | 0.650        | 0.780        | 0.872          | 0.850          | 0.865          | 0.977         | 0.868          | 0.927          | 0.525         | 0.793            | 0.863          |
| <i>CELF2</i>    | 0.985          | 0.941          | 0.987          | 0.407         | 0.108        | 0.663        | 0.485          | 0.900          | 0.963          | 0.974         | 0.997          | 0.943          | 0.965         | 0.886            | 0.888          |
| <i>HIST1H1A</i> | <b>0.019</b>   | <b>0.013</b>   | <b>0.011</b>   | <b>0.003</b>  | <b>0.004</b> | <b>0.006</b> | <b>0.024</b>   | <b>0.011</b>   | <b>0.019</b>   | <b>0.034</b>  | <b>0.012</b>   | <b>0.013</b>   | <b>0.025</b>  | <b>0.001</b>     | <b>0.014</b>   |
| <i>HIST1H1E</i> | <b>0.005</b>   | <b>0.002</b>   | <b>0.005</b>   | 0.310         | 0.201        | 0.051        | <b>0.048</b>   | <b>0.005</b>   | <b>0.013</b>   | <b>0.003</b>  | <b>0.006</b>   | <b>0.010</b>   | <b>0.011</b>  | <b>0.005</b>     | <b>0.006</b>   |
| <i>HIST1H4E</i> | <b>0.010</b>   | <b>0.012</b>   | <b>0.011</b>   | <b>0.003</b>  | <b>0.004</b> | <b>0.008</b> | <b>0.018</b>   | <b>0.010</b>   | <b>0.017</b>   | <b>0.038</b>  | <b>0.012</b>   | <b>0.011</b>   | <b>0.030</b>  | <b>0.002</b>     | <b>0.013</b>   |
| <i>IL1B</i>     | <b>0.001</b>   | <b>0.0003</b>  | <b>0.001</b>   | <b>0.005</b>  | <b>0.042</b> | <b>0.002</b> | <b>0.003</b>   | <b>0.0005</b>  | <b>0.002</b>   | <b>0.001</b>  | <b>0.002</b>   | <b>0.0005</b>  | <b>0.001</b>  | <b>0.001</b>     | <b>0.0003</b>  |
| <i>IRF2</i>     | 0.194          | 0.260          | 0.190          | <b>0.019</b>  | <b>0.011</b> | 0.442        | 0.134          | 0.150          | 0.217          | 0.864         | 0.292          | 0.142          | 0.153         | 0.191            | 0.195          |
| <i>NRG1</i>     | 0.327          | 0.323          | 0.231          | 0.332         | 0.450        | 0.580        | 0.623          | 0.167          | 0.652          | 0.648         | 0.323          | 0.355          | 0.687         | 0.342            | 0.414          |
| <i>POTEKP</i>   | <b>0.011</b>   | <b>0.013</b>   | <b>0.012</b>   | <b>0.001</b>  | <b>0.004</b> | <b>0.004</b> | <b>0.027</b>   | <b>0.010</b>   | <b>0.019</b>   | <b>0.039</b>  | <b>0.014</b>   | <b>0.011</b>   | <b>0.024</b>  | <b>0.002</b>     | <b>0.014</b>   |
| <i>PPT1</i>     | <b>0.00005</b> | <b>0.00009</b> | <b>0.00001</b> | <b>0.0001</b> | <b>0.001</b> | <b>0.001</b> | <b>0.00006</b> | <b>0.00005</b> | <b>0.00007</b> | <b>0.0005</b> | <b>0.00004</b> | <b>0.00008</b> | <b>0.0002</b> | <b>0.00005</b>   | <b>0.00005</b> |
| <i>SORT1</i>    | 0.775          | 0.907          | 0.741          | 0.780         | 0.753        | 0.773        | 0.744          | 0.663          | 0.973          | 0.960         | 0.704          | 0.902          | 0.830         | 0.953            | 0.619          |
| <i>TNF</i>      | <b>0.0005</b>  | <b>0.001</b>   | <b>0.0002</b>  | <b>0.001</b>  | <b>0.007</b> | <b>0.005</b> | <b>0.003</b>   | <b>0.001</b>   | <b>0.001</b>   | <b>0.002</b>  | <b>0.001</b>   | <b>0.001</b>   | <b>0.001</b>  | <b>0.0003</b>    | <b>0.0002</b>  |
| <i>TPP1</i>     | 0.051          | 0.052          | <b>0.045</b>   | 0.177         | <b>0.028</b> | 0.326        | <b>0.027</b>   | 0.061          | <b>0.025</b>   | <b>0.014</b>  | <b>0.041</b>   | 0.077          | <b>0.045</b>  | 0.056            | 0.051          |

Abbreviations: AAP, atypical antipsychotics; Mirt, mirtazapine; Mono, monotherapy; Other antidep, tricyclic and IMAO antidepressant; Rec, recurrent; SNRI, serotonin-norepinephrine reuptake inhibitor; SSRI, selective serotonin reuptake inhibitor; Treat, treatment

### 3 SUPPLEMENTARY FIGURES

#### Supplementary Figure S1: Sample size calculation

To evaluate the number of samples required for the microarray screen, a minimum sample size was determined by using sizepower tool within the R package with the following parameters: FDR = 5 %, power of the study = 90%, expected difference between groups = 1.5, and standard deviation = 0.5. Three curves were drawn according to different values for the percentage of significant genes ( $1-\pi_0$ ). The dashed line indicate that with a power of 90% and  $\pi_0 = 0.095$ , the minimum sample size is 9.

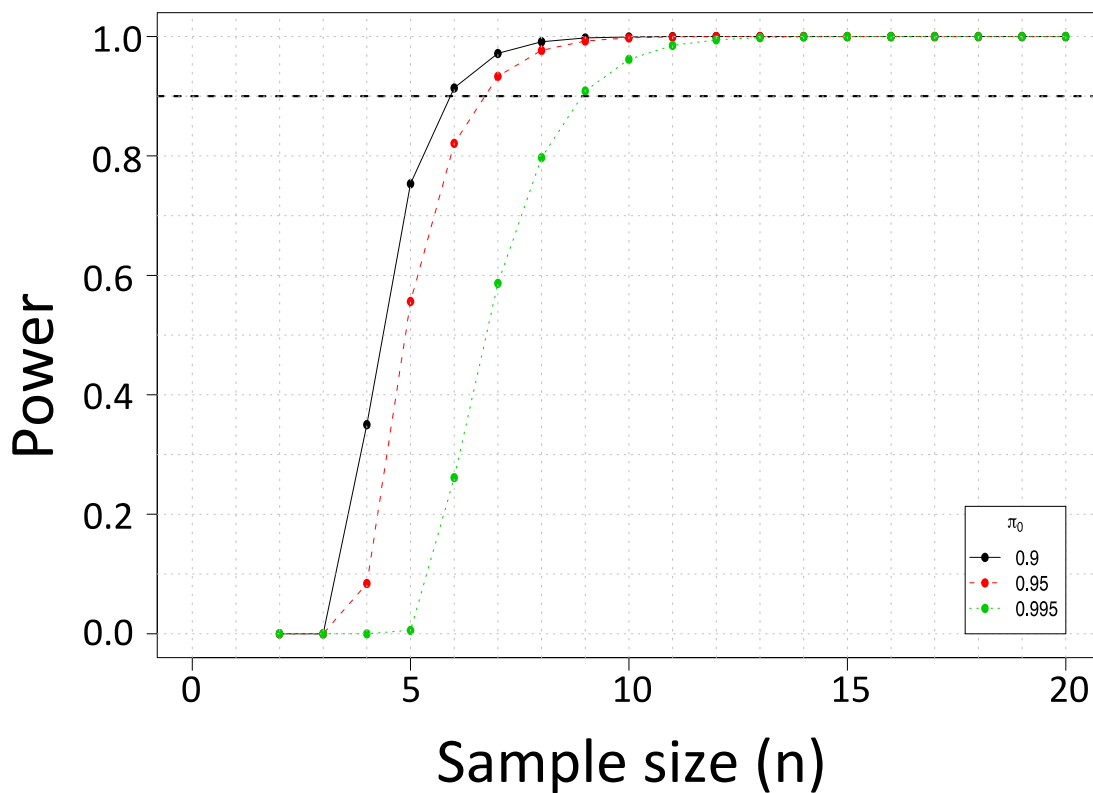

### Supplementary Figure S2: Spearman's correlation between HDRS score evolution and mRNA expression level for *PPT1* and *CELF2*

Each circle indicates, for a specified MDE patient (the label attached to the circle refers to the case number in Table 1), the difference of HDRS scores at week 2 and 8 weeks after inclusion as a function of the *PPT1* (a) or *CELF2* FC (b) for MDE<sub>2w</sub> sample, calculated with the  $2^{-\Delta\Delta Ct}$  method.

The calibrator was a mathematical pool of control sample Ct. Normalization was performed using *GAPDH* and *PAFAH1B1* for *PPT1*, and *PAFAH1B1* and *ALDOC* for *CELF2*.

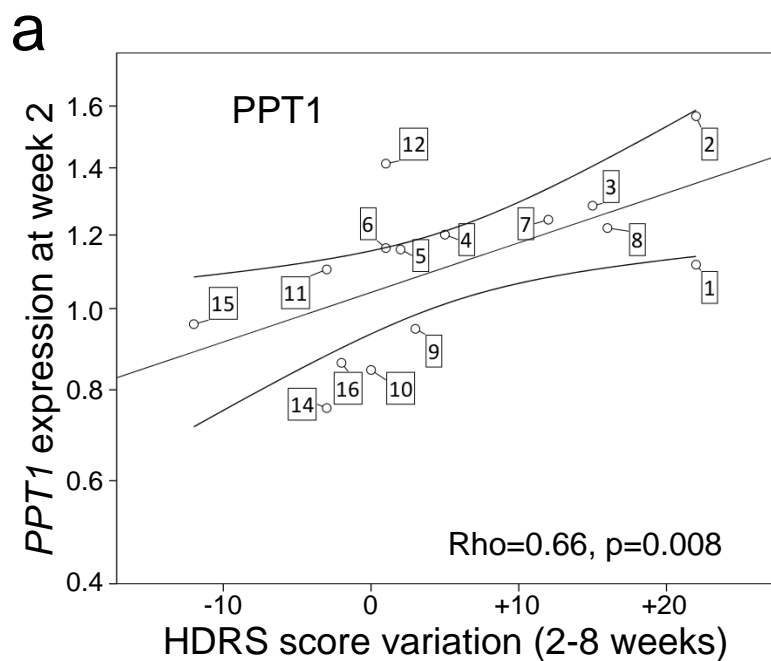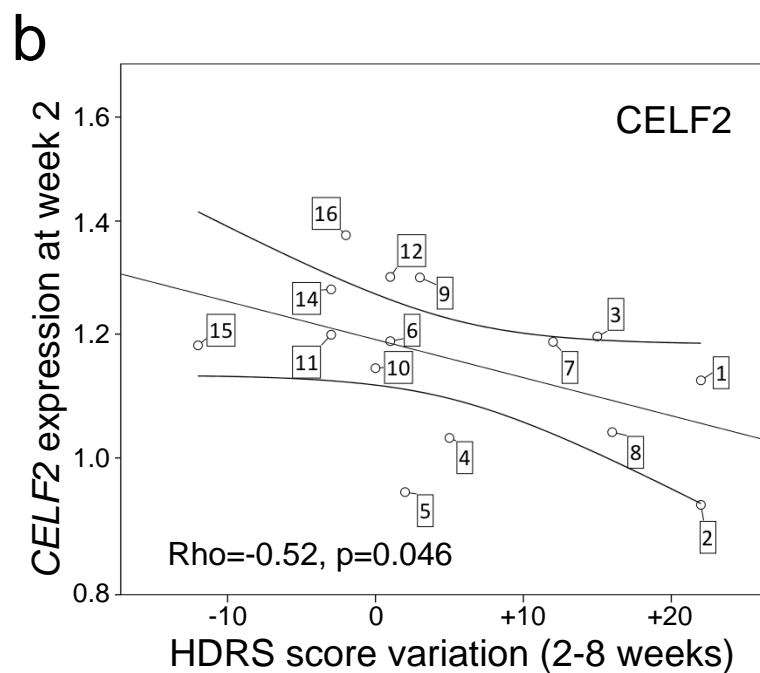

**Supplementary Figure S3: ROC curve for prediction of treatment response after 8 weeks considering the individual expression of 4 transcripts**

**(a) *HIST1H1E*, (b) *IL1B*, (c) *PPT1*, (d) and *TNF*.**

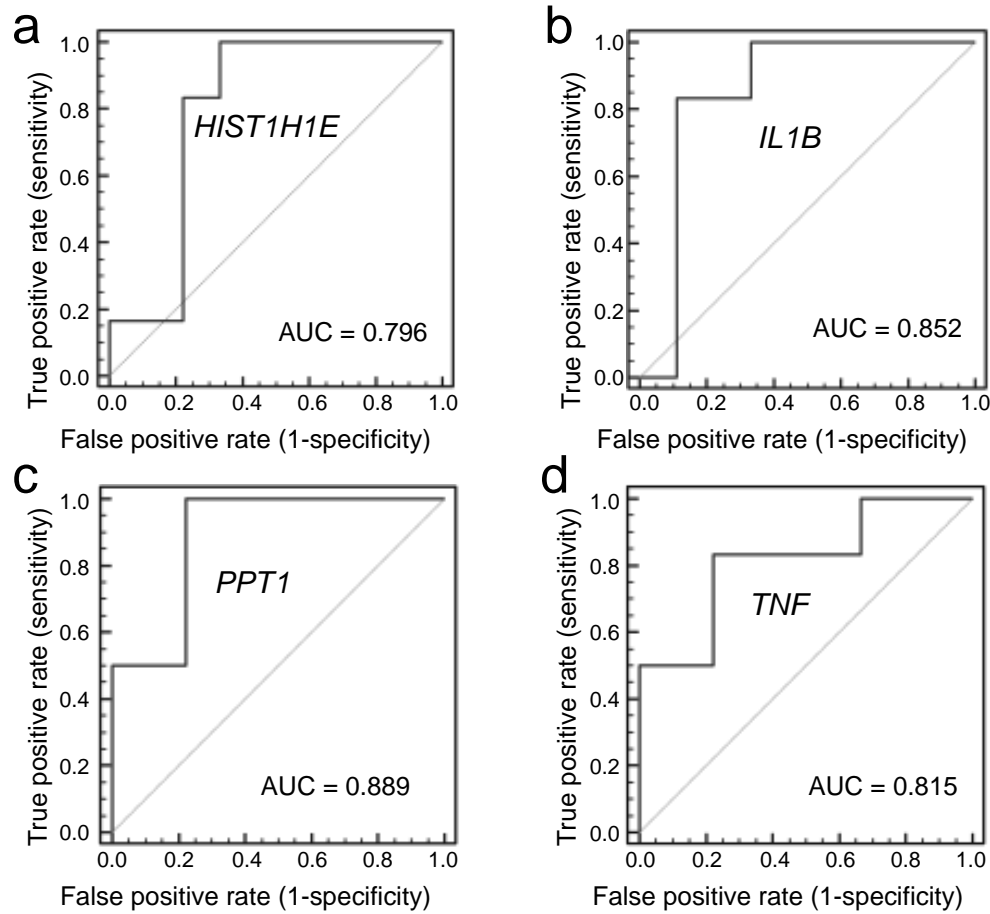

## 4 REFERENCES

1. American Psychiatric Association. *Diagnostic and Statistical Manual of Mental Disorders, Fourth Edition, Text Revision (DSM-IV-TR)*. American Psychiatric Association: Arlington, VA, 2000.
2. American Psychiatric Association. *Handbook of psychiatric measures*. 2d edn. American Psychiatric Association (APA): Washington, DC, 2008, 864pp.
3. First MB, Spitzer RL, Gibbon M, Williams JBW. Structured Clinical Interview for DSM-IV-TR Axis I Disorders, Research Version, Patient Edition. (SCID-I/P). New York: New York State Psychiatric Institute; 2002.
4. Guelfi JD. *L'évaluation clinique standardisée en psychiatrie*. Editions médicales Pierre Fabre: Boulogne, 1997.
5. Frank E, Prien RF, Jarrett RB, Keller MB, Kupfer DJ, Lavori PW *et al*. Conceptualization and rationale for consensus definitions of terms in major depressive disorder. Remission, recovery, relapse, and recurrence. *Arch Gen Psychiatry* 1991; **48**: 851-855.
6. Huang da W, Sherman BT, Lempicki RA. Systematic and integrative analysis of large gene lists using DAVID bioinformatics resources. *Nat Protoc* 2009; **4**: 44-57.

7. Chen J, Bardes EE, Aronow BJ, Jegga AG. ToppGene Suite for gene list enrichment analysis and candidate gene prioritization. *Nucleic Acids Res* 2009; **37**: W305-311.
8. Vandesompele J, De Preter K, Pattyn F, Poppe B, Van Roy N, De Paepe A *et al.* Accurate normalization of real-time quantitative RT-PCR data by geometric averaging of multiple internal control genes. *Genome Biol* 2002; **3**: RESEARCH0034.
9. Livak KJ, Schmittgen TD. Analysis of relative gene expression data using real-time quantitative PCR and the 2(-Delta Delta C(T)) Method. *Methods* 2001; **25**: 402-408.
10. Lee ML, Whitmore GA. Power and sample size for DNA microarray studies. *Stat Med* 2002; **21**: 3543-3570.
11. Tusher VG, Tibshirani R, Chu G. Significance analysis of microarrays applied to the ionizing radiation response. *Proc Natl Acad Sci U S A* 2001; **98**: 5116-5121.
12. Saeed AI, Bhagabati NK, Braisted JC, Liang W, Sharov V, Howe EA *et al.* TM4 microarray software suite. *Methods Enzymol* 2006; **411**: 134-193.
